# Supplementary material for: A highly specific rhodamine-based colorimetric probe for hypochlorites: a new sensing strategy and real application in tap water
Source: Royal Society of Chemistry journal article supplement (doi:10.1039/c0cc04911e), 2011-01-01
Supplement: c0cc04911e.pdf [file c0cc04911e.pdf]

**Electronic Supplementary Information (ESI)**

**A highly specific Rhodamine-based colorimetric probe for hypochlorite and its application in tap water**

*Xiaoding Lou, Yi Zhang, Qianqian Li, \* Jingui Qin, and Zhen Li \**

*Department of Chemistry, Hubei Key Lab on Organic and Polymeric Opto-Electronic Materials, Wuhan University, Wuhan, 430072, China. Fax: 86 27 68756757; Tel: 86 27 62254108; E-mail: [lizhen@whu.edu.cn](mailto:lizhen@whu.edu.cn)*

**Experimental Section**

**Materials and Instrumentations**

Compound **1** was obtained following literature procedures.<sup>[25]</sup> All reagents were of analytical reagent grade and used without further purification. Doubly distilled water was used for all experiments. CuI, NaClO, H<sub>2</sub>O<sub>2</sub>, Na<sub>2</sub>SO<sub>4</sub>, NaClO<sub>4</sub>, NaNO<sub>2</sub>, Na<sub>2</sub>CO<sub>3</sub>, NaAc·3H<sub>2</sub>O, Na<sub>4</sub>P<sub>2</sub>O<sub>7</sub> and Sodium Ascorbate were purchased from Sinopharm Chemical Reagent Beijing Co., Ltd. UV-visible spectra were obtained using a Shimadzu UV-2550 spectrometer, and the pH values were determined by using a DELTA 320 PH dollar.

**Preparation of solutions of metal ions and anions**

1 mmol of each reagents (CuI, 190 mg; NaClO, 680 μL; H<sub>2</sub>O<sub>2</sub>, 100 μL; Na<sub>2</sub>SO<sub>4</sub>, 142 mg; NaClO<sub>4</sub>, 122 mg; NaNO<sub>2</sub>, 69 mg; Na<sub>2</sub>CO<sub>3</sub>, 106 mg; NaAc·3H<sub>2</sub>O, 136 mg; Na<sub>4</sub>P<sub>2</sub>O<sub>7</sub>, 266 mg; Sodium Ascorbate, 198 mg) was dissolved in distilled water (10 mL) to afford 1×10<sup>-1</sup> mol/L aqueous solution. Tris-HCl buffer solutions (pH = 7.0) were prepared using 0.01 M Tris, proper amount of HCl under adjustment by a pH meter. The stock solutions could be diluted to desired concentrations with water before usage. A 5.0×10<sup>-4</sup> mol/L stock solution of Compound **1** was

prepared in acetonitrile, then 200  $\mu\text{L}$  of this stock solution was added to a 10 mL glass tube and diluted by Tris-HCl (10 mM, pH = 7.0) buffer and acetonitrile to obtain the solutions of **1** (10  $\mu\text{M}$ ) in Tris-HCl buffer containing 50%(v/v) water/ $\text{CH}_3\text{CN}$ .

#### **UV absorption changes of **1** by $\text{Cu}^+$**

A solution of **1** (10  $\mu\text{M}$ ) was prepared in Tris-HCl (10 mM, pH = 7.0) buffer containing 50% (v/v) water/ $\text{CH}_3\text{CN}$ , then 3.0 mL of the solution of **1** was placed in a quartz cell (10.0 mm width) and the UV absorption spectrum was recorded before and after the addition of Sodium Ascorbate and  $\text{Cu}^+$  to the solution of **1**.

#### **UV absorption changes of **1** + $\text{Cu}^+$ with $\text{ClO}^-$**

A solution of **1** (10  $\mu\text{M}$ ) was prepared in Tris-HCl (10 mM, pH = 7.0) buffer containing 50% (v/v) water/ $\text{CH}_3\text{CN}$ , then 3.0 mL of the solution of **1** was placed in a quartz cell (10.0 mm width) and the UV absorption spectrum was recorded. After the solution of Sodium Ascorbate and  $\text{Cu}^+$  was added to **1**, the solution of NaClO was introduced in portions and the UV absorption changes were recorded at room temperature each time.

#### **UV absorption changes of **1** + $\text{Cu}^+$ with other anions**

The solutions of anions were prepared in distilled water. UV absorption changes of **1** ( $1.0 \times 10^{-5}$  mol/L) +  $\text{Cu}^+$  ( $4.0 \times 10^{-5}$  mol/L) + Sodium Ascorbate ( $3.0 \times 10^{-6}$  mol/L) were recorded before and after the addition of anions to the solution of **1**.

#### **UV absorption changes of **1** + $\text{Cu}^{2+}$ with tap water**

The UV absorption changes of **1** ( $1.0 \times 10^{-5}$  mol/L) +  $\text{Cu}^+$  ( $4.0 \times 10^{-5}$  mol/L) + Sodium Ascorbate ( $3.0 \times 10^{-6}$  mol/L) were recorded before and after the addition of different amount of tap water.

#### **UV absorption changes of **1** + $\text{Cu}^+$ with $\text{ClO}^-$ and other anions**

Then UV absorption changes of **1** ( $1.0 \times 10^{-5}$  mol/L) +  $\text{Cu}^+$  ( $4.0 \times 10^{-5}$  mol/L) + Sodium

Ascorbate ( $3.0 \times 10^{-6}$  mol/L) were recorded before and after the addition of NaClO and the other anions ( $\text{CO}_3^{2-}$ ,  $\text{Ac}^-$ ,  $\text{P}_2\text{O}_7^{4-}$ ).

#### UV absorption changes of **1** + $\text{P}_2\text{O}_7^{4-}$ with $\text{Cu}^{2+}$

The UV absorption changes of **1** ( $1.0 \times 10^{-5}$  mol/L) +  $\text{P}_2\text{O}_7^{4-}$  ( $7.0 \times 10^{-5}$  mol/L) were recorded before and after the addition of different amount of  $\text{Cu}^{2+}$ .

#### UV absorption changes of **1** + $\text{P}_2\text{O}_7^{4-}$ + $\text{Cu}^{2+}$ + $\text{Cu}^+$ with $\text{ClO}^-$

The UV absorption changes of **1** ( $1.0 \times 10^{-5}$  mol/L) +  $\text{P}_2\text{O}_7^{4-}$  ( $7.0 \times 10^{-5}$  mol/L) +  $\text{Cu}^{2+}$  ( $5.0 \times 10^{-5}$ ,  $4.0 \times 10^{-5}$ ,  $3.0 \times 10^{-5}$ ,  $2.0 \times 10^{-5}$  mol/L) +  $\text{Cu}^+$  ( $4.0 \times 10^{-5}$  mol/L) + Sodium Ascorbate ( $3.0 \times 10^{-6}$  mol/L) were recorded before and after the addition of different amount of  $\text{ClO}^-$ .

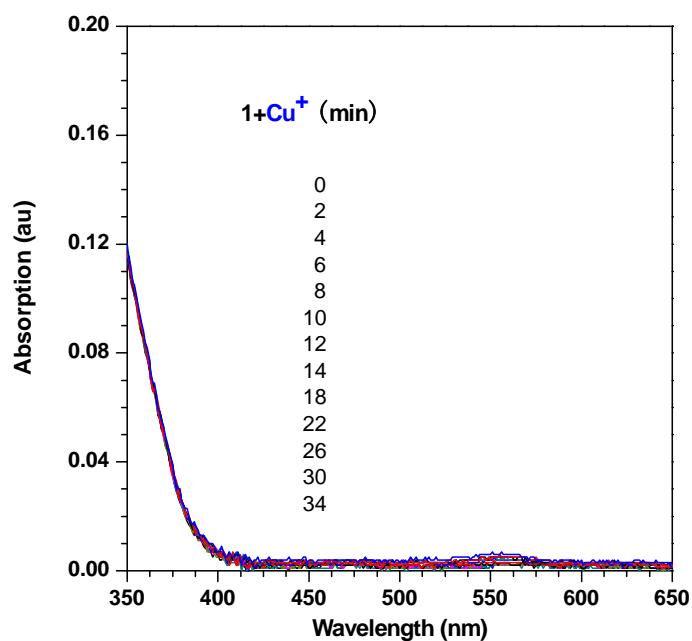

**Fig. S1** Absorption spectra of **1** ( $1.0 \times 10^{-5}$  mol/L), CuI ( $3.0 \times 10^{-5}$  mol/L) and Sodium Ascorbate ( $1.0 \times 10^{-6}$  mol/L) in Tris-HCl (10 mM, pH = 7.0) buffer containing 50% (v/v) water/ $\text{CH}_3\text{CN}$ .

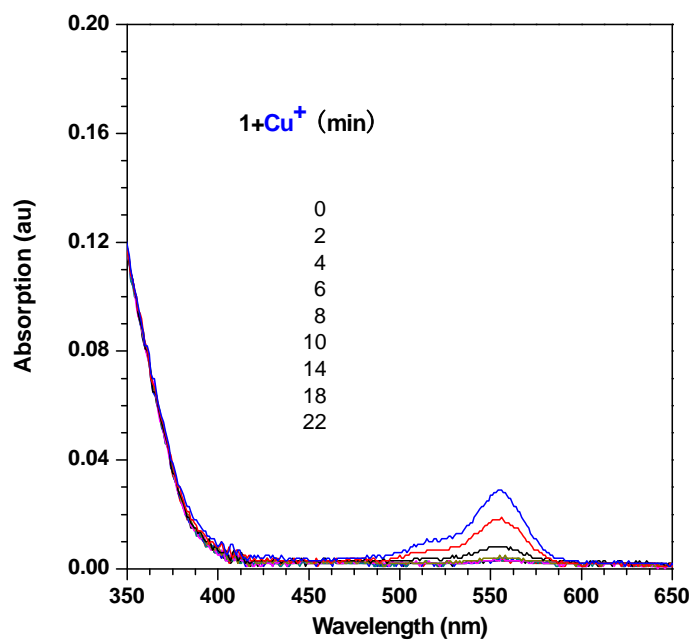

**Fig. S2** Absorption spectra of **1** ( $1.0 \times 10^{-5}$  mol/L), CuI ( $6.0 \times 10^{-5}$  mol/L) and Sodium Ascorbate ( $1.0 \times 10^{-6}$  mol/L) in Tris-HCl (10 mM, pH = 7.0) buffer containing 50% (v/v) water/CH<sub>3</sub>CN.

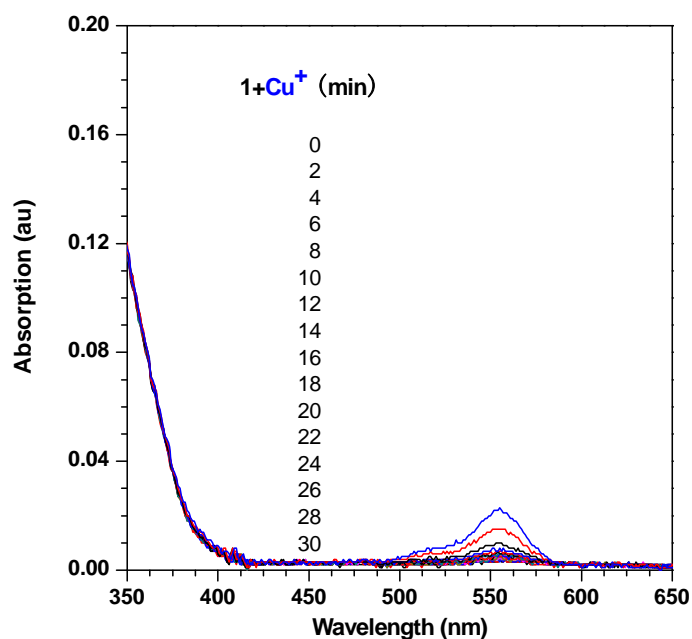

**Fig. S3** Absorption spectra of **1** ( $1.0 \times 10^{-5}$  mol/L), CuI ( $6.0 \times 10^{-5}$  mol/L) and Sodium Ascorbate ( $3.0 \times 10^{-6}$  mol/L) in Tris-HCl (10 mM, pH = 7.0) buffer containing 50% (v/v) water/CH<sub>3</sub>CN.

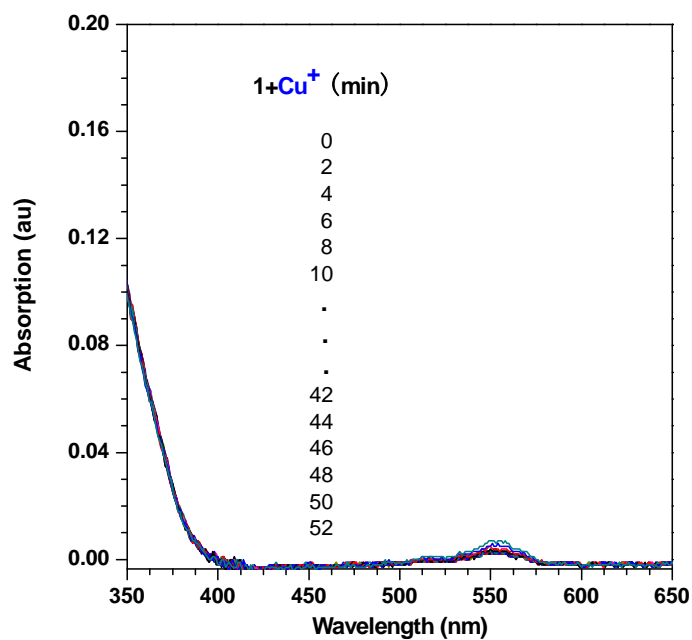

**Fig. S4** Absorption spectra of **1** ( $1.0 \times 10^{-5}$  mol/L), CuI ( $4.0 \times 10^{-5}$  mol/L) and Sodium Ascorbate ( $3.0 \times 10^{-6}$  mol/L) in Tris-HCl (10 mM, pH = 7.0) buffer containing 50% (v/v) water/CH<sub>3</sub>CN.

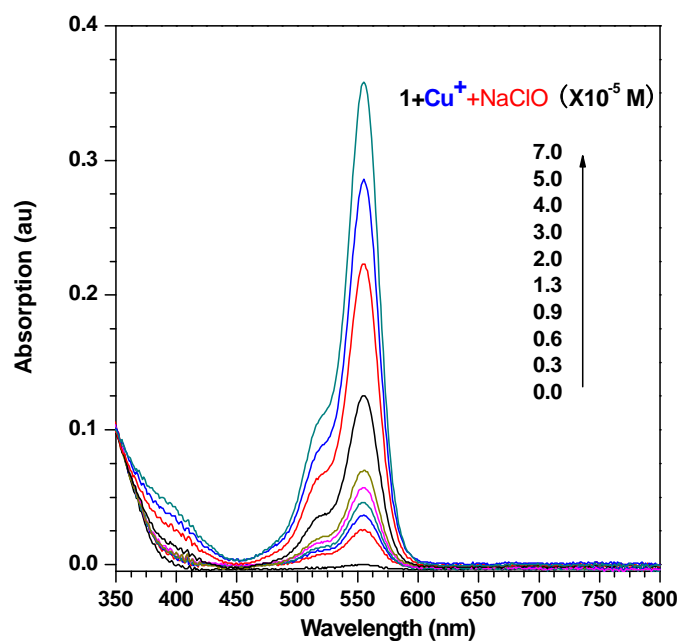

**Fig. S5** Absorption spectra of **1** ( $1.0 \times 10^{-5}$  mol/L), CuI ( $4.0 \times 10^{-5}$  mol/L) and Sodium Ascorbate ( $3.0 \times 10^{-6}$  mol/L) in Tris-HCl (10 mM, pH = 7.0) buffer containing 50% (v/v) water/CH<sub>3</sub>CN in the presence of different amounts of NaClO after 30min.

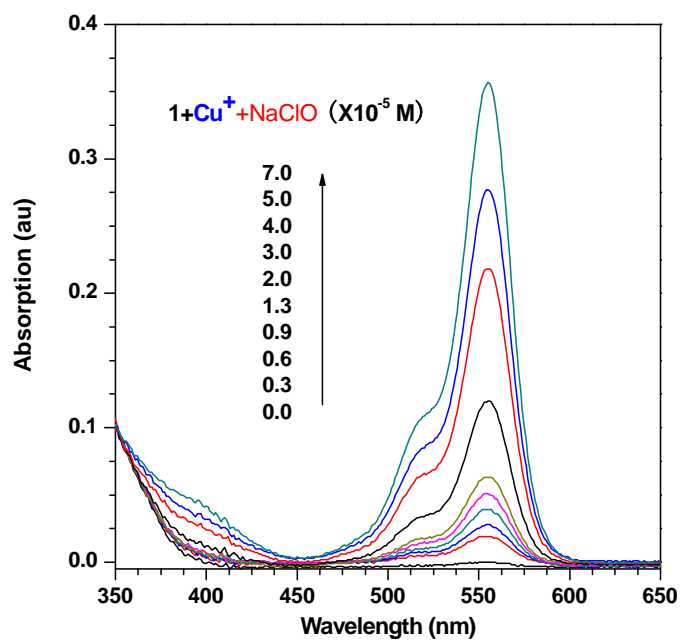

**Fig. S6** Absorption spectra of **1** ( $1.0 \times 10^{-5}$  mol/L), CuI ( $4.0 \times 10^{-5}$  mol/L) and Sodium Ascorbate ( $3.0 \times 10^{-6}$  mol/L) in Tris-HCl (10 mM, pH = 7.0) buffer containing 50% (v/v) water/CH<sub>3</sub>CN in the presence of different amounts of NaClO after 27min.

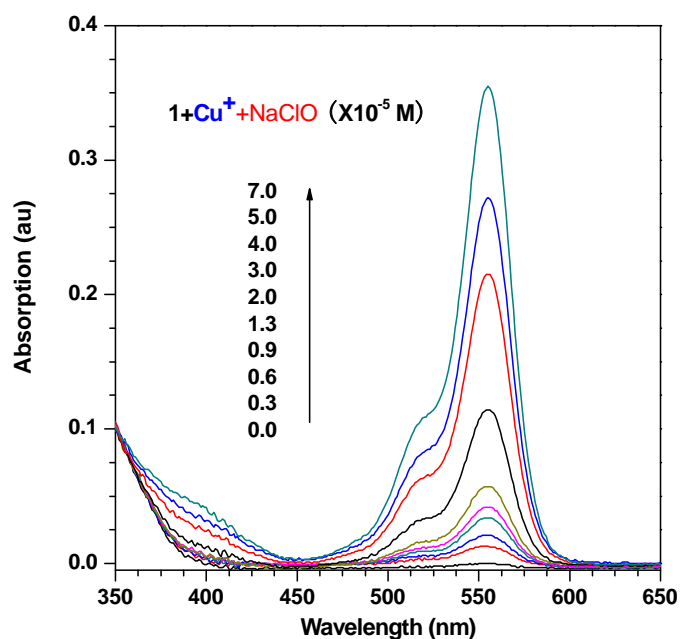

**Fig. S7** Absorption spectra of **1** ( $1.0 \times 10^{-5}$  mol/L), CuI ( $4.0 \times 10^{-5}$  mol/L) and Sodium Ascorbate ( $3.0 \times 10^{-6}$  mol/L) in Tris-HCl (10 mM, pH = 7.0) buffer containing 50% (v/v) water/CH<sub>3</sub>CN in the presence of different amounts of NaClO after 24min.

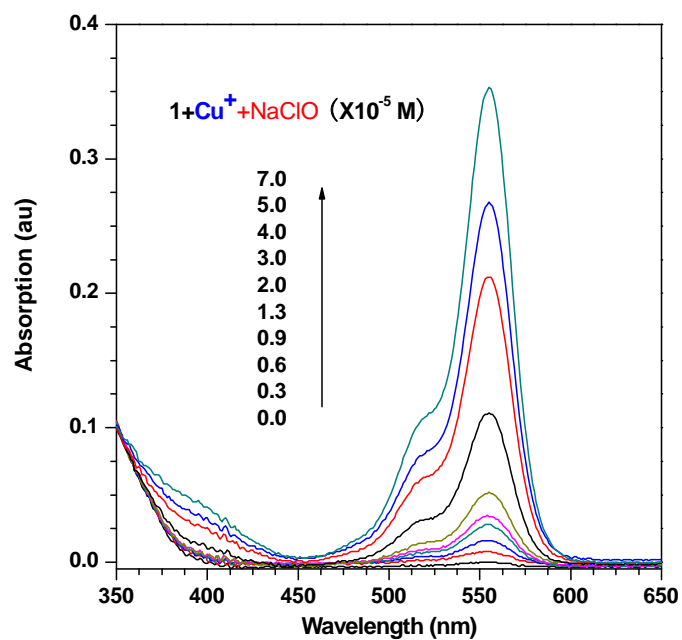

**Fig. S8** Absorption spectra of **1** ( $1.0 \times 10^{-5}$  mol/L), CuI ( $4.0 \times 10^{-5}$  mol/L) and Sodium Ascorbate ( $3.0 \times 10^{-6}$  mol/L) in Tris-HCl (10 mM, pH = 7.0) buffer containing 50% (v/v) water/CH<sub>3</sub>CN in the presence of different amounts of NaClO after 21 min.

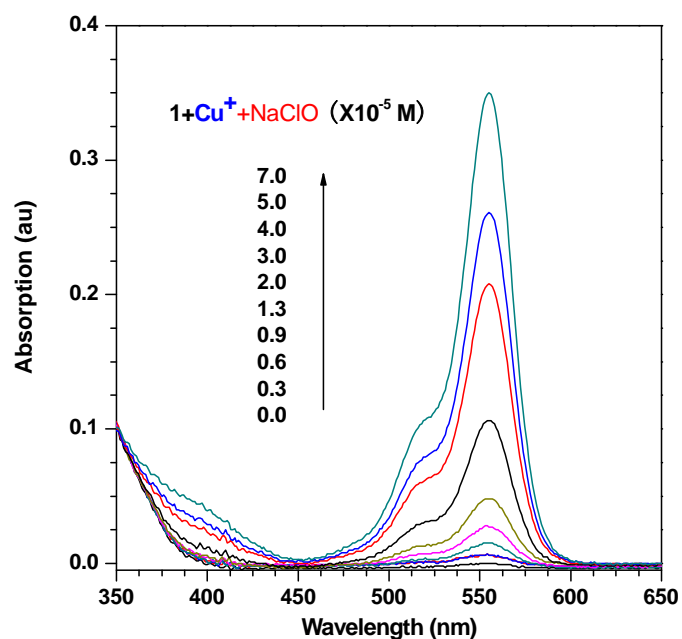

**Fig. S9** Absorption spectra of **1** ( $1.0 \times 10^{-5}$  mol/L), CuI ( $4.0 \times 10^{-5}$  mol/L) and Sodium Ascorbate ( $3.0 \times 10^{-6}$  mol/L) in Tris-HCl (10 mM, pH = 7.0) buffer containing 50% (v/v) water/CH<sub>3</sub>CN in the presence of different amounts of NaClO after 18 min.

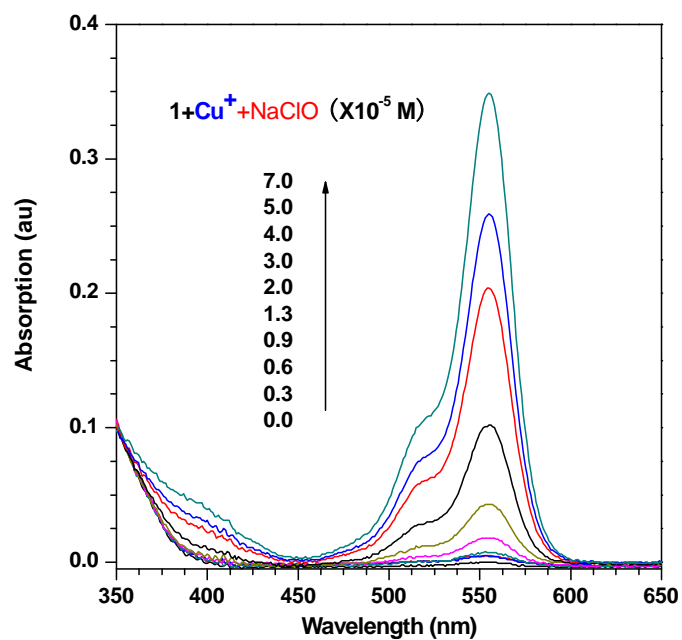

**Fig. S10** Absorption spectra of **1** ( $1.0 \times 10^{-5}$  mol/L), CuI ( $4.0 \times 10^{-5}$  mol/L) and Sodium Ascorbate ( $3.0 \times 10^{-6}$  mol/L) in Tris-HCl (10 mM, pH = 7.0) buffer containing 50% (v/v) water/CH<sub>3</sub>CN in the presence of different amounts of NaClO after 15min.

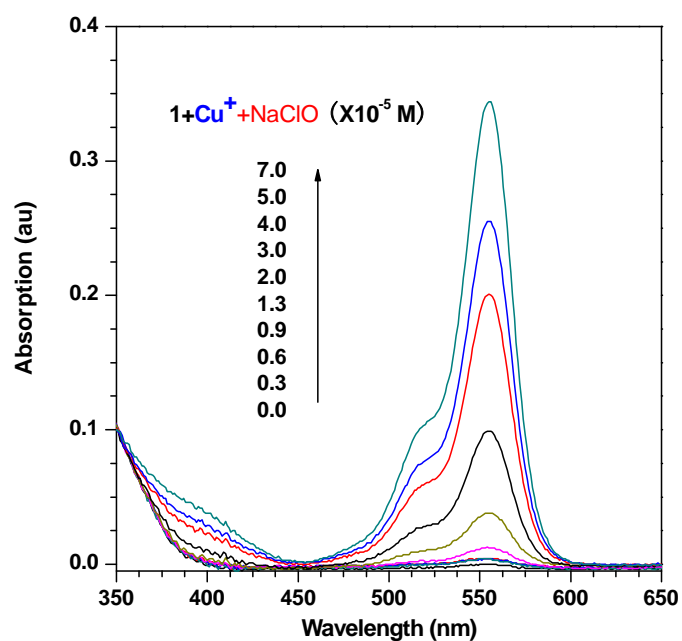

**Fig. S11** Absorption spectra of **1** ( $1.0 \times 10^{-5}$  mol/L), CuI ( $4.0 \times 10^{-5}$  mol/L) and Sodium Ascorbate ( $3.0 \times 10^{-6}$  mol/L) in Tris-HCl (10 mM, pH = 7.0) buffer containing 50% (v/v) water/CH<sub>3</sub>CN in the presence of different amounts of NaClO after 12min.



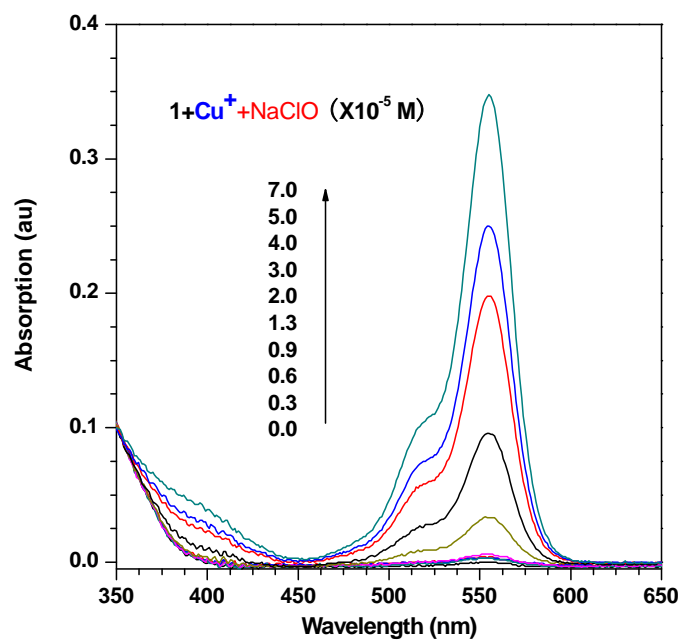

**Fig. S12** Absorption spectra of **1** ( $1.0 \times 10^{-5}$  mol/L), CuI ( $4.0 \times 10^{-5}$  mol/L) and Sodium Ascorbate ( $3.0 \times 10^{-6}$  mol/L) in Tris-HCl (10 mM, pH = 7.0) buffer containing 50% (v/v) water/CH<sub>3</sub>CN in the presence of different amounts of NaClO after 9min.

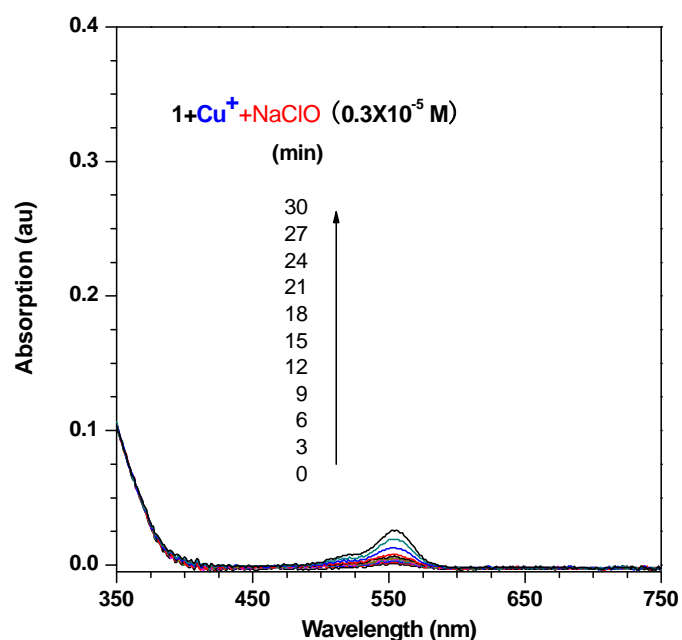

**Fig. S13** Absorption spectra of **1** ( $1.0 \times 10^{-5}$  mol/L), CuI ( $4.0 \times 10^{-5}$  mol/L) and Sodium Ascorbate ( $3.0 \times 10^{-6}$  mol/L) in Tris-HCl (10 mM, pH = 7.0) buffer containing 50% (v/v) water/CH<sub>3</sub>CN in the presence of NaClO ( $3.0 \times 10^{-6}$  mol/L) at different time.

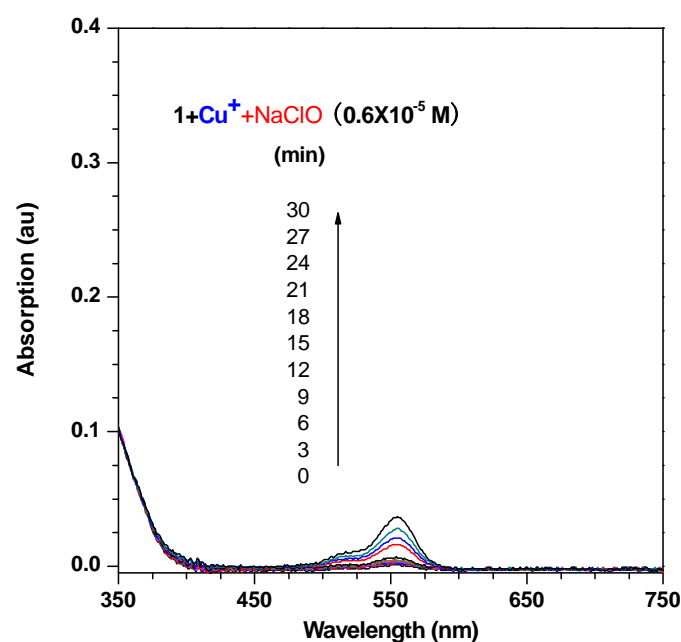

**Fig. S14** Absorption spectra of **1** ( $1.0 \times 10^{-5}$  mol/L), CuI ( $4.0 \times 10^{-5}$  mol/L) and Sodium Ascorbate ( $3.0 \times 10^{-6}$  mol/L) in Tris-HCl (10 mM, pH = 7.0) buffer containing 50% (v/v) water/CH<sub>3</sub>CN in the presence of NaClO ( $6.0 \times 10^{-6}$  mol/L) at different time.

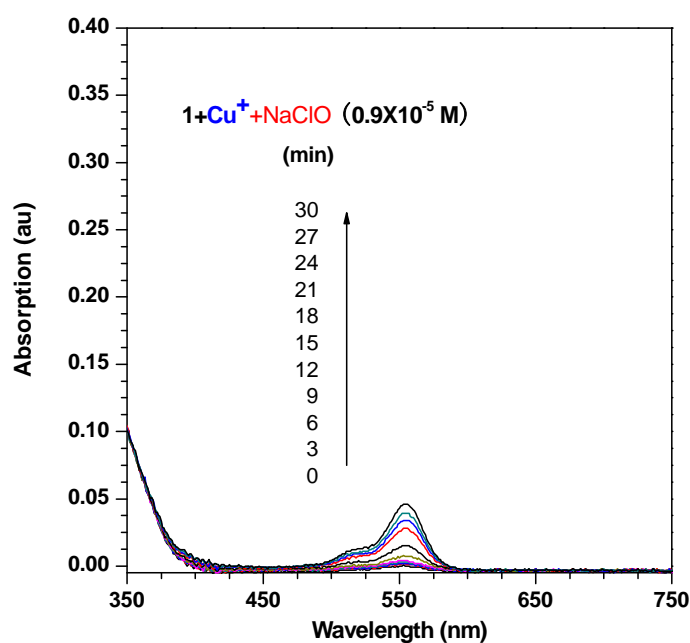

**Fig. S15** Absorption spectra of **1** ( $1.0 \times 10^{-5}$  mol/L), CuI ( $4.0 \times 10^{-5}$  mol/L) and Sodium Ascorbate ( $3.0 \times 10^{-6}$  mol/L) in Tris-HCl (10 mM, pH = 7.0) buffer containing 50% (v/v) water/CH<sub>3</sub>CN in the presence of NaClO ( $9.0 \times 10^{-6}$  mol/L) at different time.

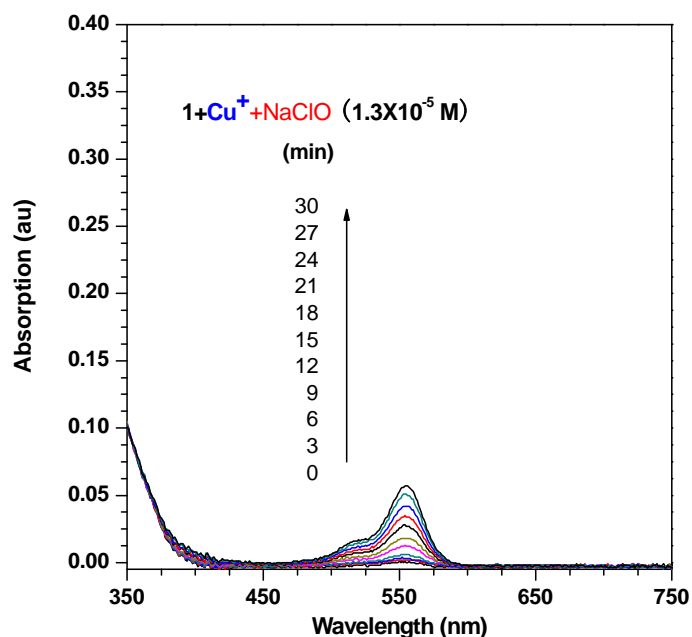

**Fig. S16** Absorption spectra of **1** ( $1.0 \times 10^{-5}$  mol/L), CuI ( $4.0 \times 10^{-5}$  mol/L) and Sodium Ascorbate ( $3.0 \times 10^{-6}$  mol/L) in Tris-HCl (10 mM, pH = 7.0) buffer containing 50% (v/v) water/CH<sub>3</sub>CN in the presence of NaClO ( $1.3 \times 10^{-5}$  mol/L) at different time.

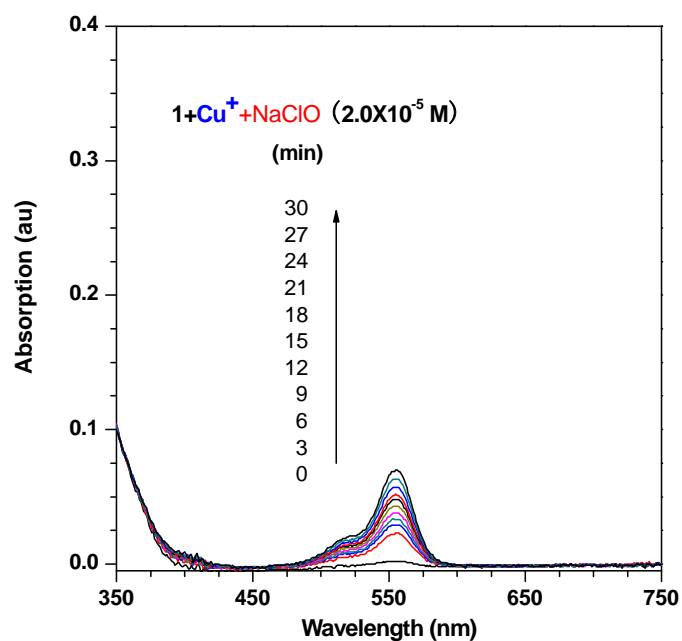

**Fig. S17** Absorption spectra of **1** ( $1.0 \times 10^{-5}$  mol/L), CuI ( $4.0 \times 10^{-5}$  mol/L) and Sodium Ascorbate ( $3.0 \times 10^{-6}$  mol/L) in Tris-HCl (10 mM, pH = 7.0) buffer containing 50% (v/v) water/CH<sub>3</sub>CN in the presence of NaClO ( $2.0 \times 10^{-5}$  mol/L) at different time.

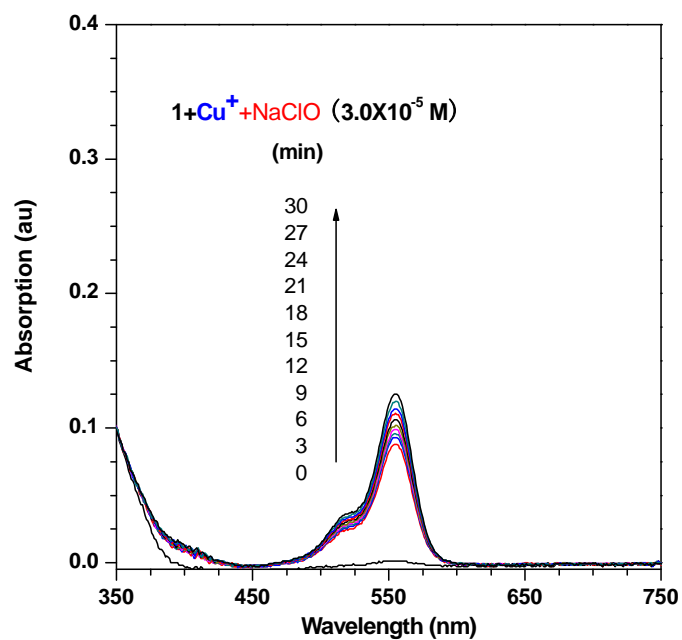

**Fig. S18** Absorption spectra of **1** ( $1.0 \times 10^{-5}$  mol/L), CuI ( $4.0 \times 10^{-5}$  mol/L) and Sodium Ascorbate ( $3.0 \times 10^{-6}$  mol/L) in Tris-HCl (10 mM, pH = 7.0) buffer containing 50% (v/v) water/CH<sub>3</sub>CN in the presence of NaClO ( $3.0 \times 10^{-5}$  mol/L) at different time.

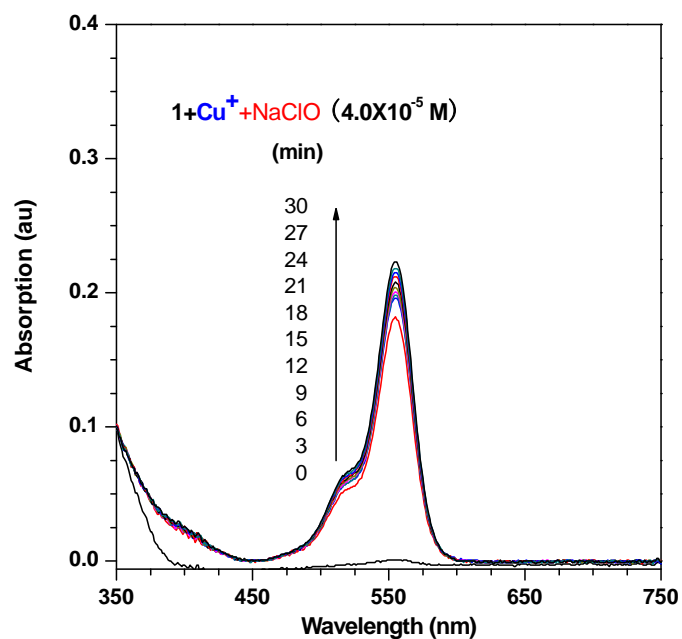

**Fig. S19** Absorption spectra of **1** ( $1.0 \times 10^{-5}$  mol/L), CuI ( $4.0 \times 10^{-5}$  mol/L) and Sodium Ascorbate ( $3.0 \times 10^{-6}$  mol/L) in Tris-HCl (10 mM, pH = 7.0) buffer containing 50% (v/v) water/CH<sub>3</sub>CN in the presence of NaClO ( $4.0 \times 10^{-5}$  mol/L) at different time.

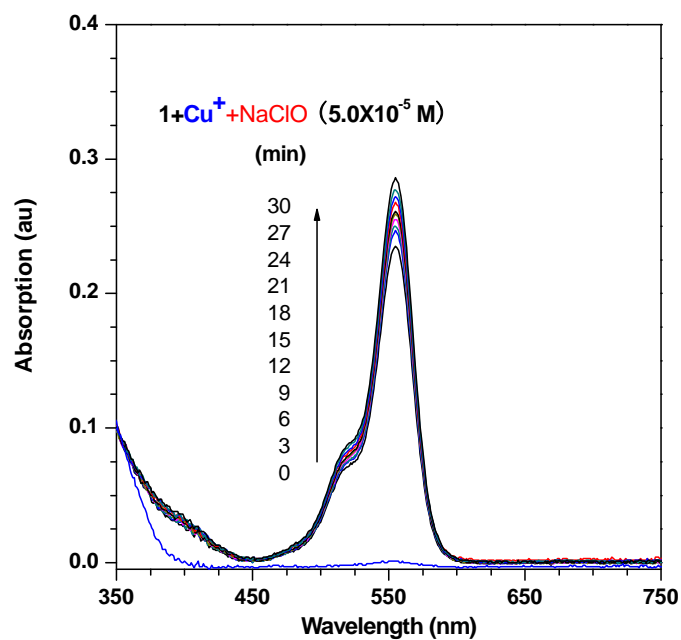

**Fig. S20** Absorption spectra of **1** ( $1.0 \times 10^{-5}$  mol/L), CuI ( $4.0 \times 10^{-5}$  mol/L) and Sodium Ascorbate ( $3.0 \times 10^{-6}$  mol/L) in Tris-HCl (10 mM, pH = 7.0) buffer containing 50% (v/v) water/CH<sub>3</sub>CN in the presence of NaClO ( $5.0 \times 10^{-5}$  mol/L) at different time.

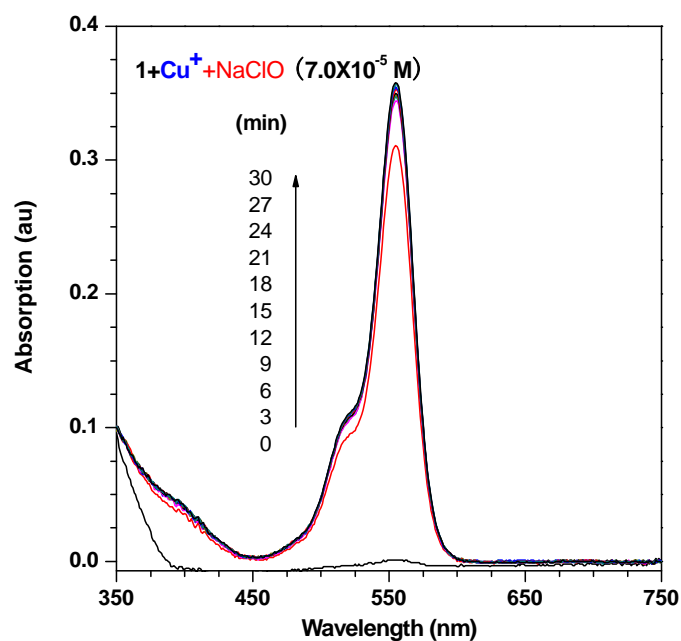

**Fig. S21** Absorption spectra of **1** ( $1.0 \times 10^{-5}$  mol/L), CuI ( $4.0 \times 10^{-5}$  mol/L) and Sodium Ascorbate ( $3.0 \times 10^{-6}$  mol/L) in Tris-HCl (10 mM, pH = 7.0) buffer containing 50% (v/v) water/CH<sub>3</sub>CN in the presence of NaClO ( $7.0 \times 10^{-5}$  mol/L) at different time.

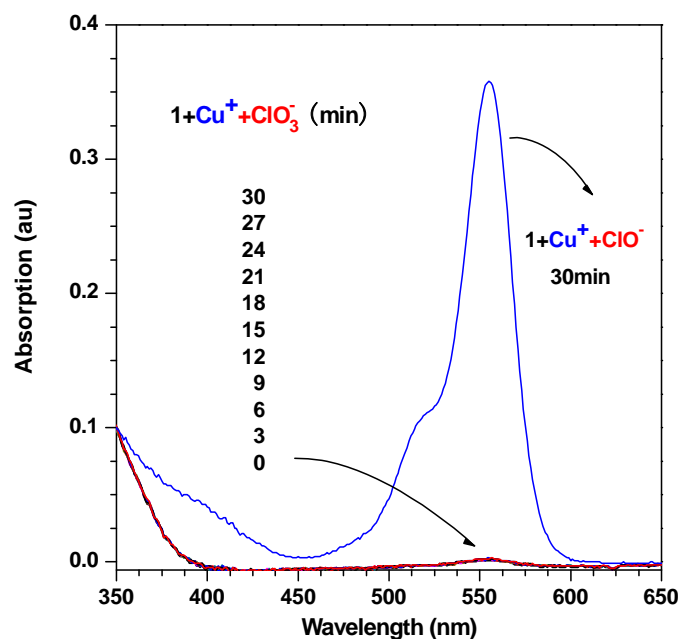

**Fig. S22** Absorption spectra of **1** ( $1.0 \times 10^{-5}$  mol/L), CuI ( $4.0 \times 10^{-5}$  mol/L) and Sodium Ascorbate ( $3.0 \times 10^{-6}$  mol/L) in Tris-HCl (10 mM, pH = 7.0) buffer containing 50% (v/v) water/ $\text{CH}_3\text{CN}$  in the presence of  $\text{ClO}_3^-$  ( $1.3 \times 10^{-4}$  mol/L). The concentration of  $\text{ClO}^-$  was  $7.0 \times 10^{-5}$  mol/L.

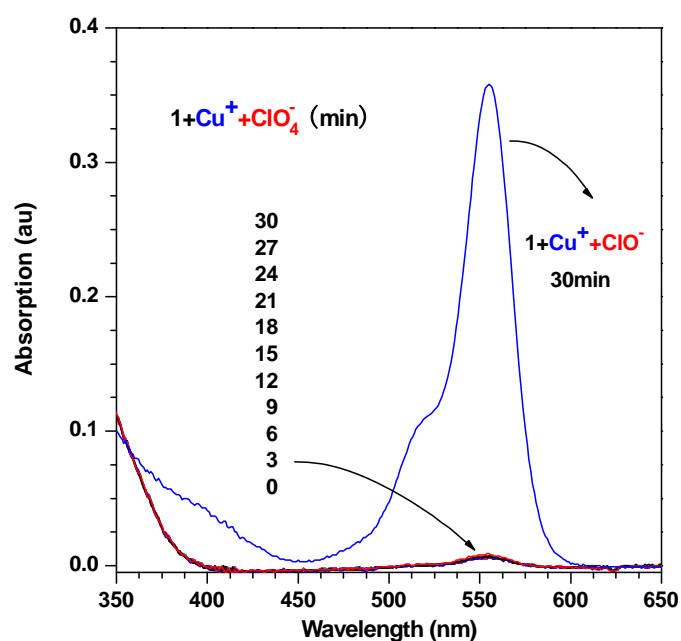

**Fig. S23** Absorption spectra of **1** ( $1.0 \times 10^{-5}$  mol/L), CuI ( $4.0 \times 10^{-5}$  mol/L) and Sodium Ascorbate ( $3.0 \times 10^{-6}$  mol/L) in Tris-HCl (10 mM, pH = 7.0) buffer containing 50% (v/v) water/ $\text{CH}_3\text{CN}$  in the presence of  $\text{ClO}_4^-$  ( $1.3 \times 10^{-4}$  mol/L). The concentration of  $\text{ClO}^-$  was  $7.0 \times 10^{-5}$  mol/L.

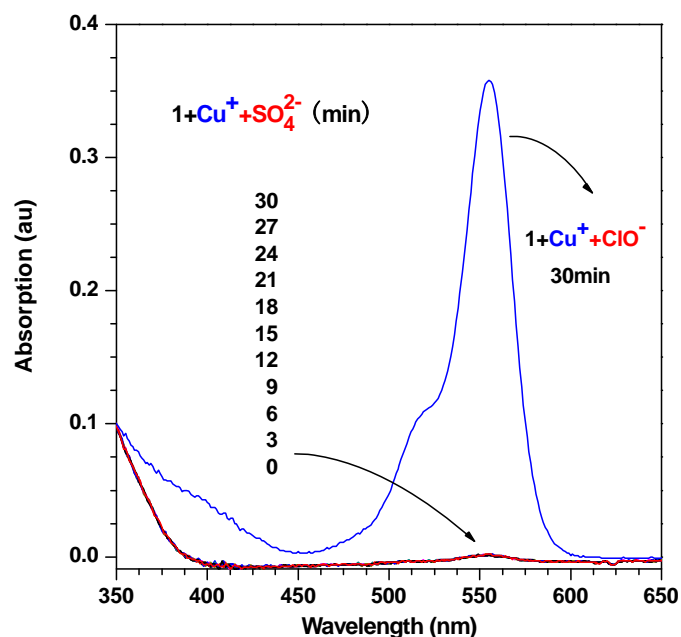

**Fig. S24** Absorption spectra of **1** ( $1.0 \times 10^{-5}$  mol/L), CuI ( $4.0 \times 10^{-5}$  mol/L) and Sodium Ascorbate ( $3.0 \times 10^{-6}$  mol/L) in Tris-HCl (10 mM, pH = 7.0) buffer containing 50% (v/v) water/CH<sub>3</sub>CN in the presence of SO<sub>4</sub><sup>2-</sup> ( $1.3 \times 10^{-4}$  mol/L). The concentration of ClO<sup>-</sup> was  $7.0 \times 10^{-5}$  mol/L.

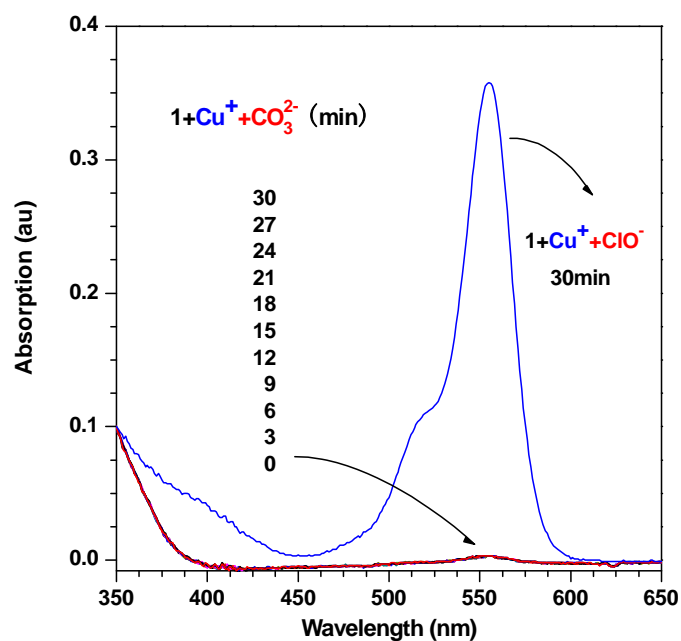

**Fig. S25** Absorption spectra of **1** ( $1.0 \times 10^{-5}$  mol/L), CuI ( $4.0 \times 10^{-5}$  mol/L) and Sodium Ascorbate ( $3.0 \times 10^{-6}$  mol/L) in Tris-HCl (10 mM, pH = 7.0) buffer containing 50% (v/v) water/CH<sub>3</sub>CN in the presence of CO<sub>3</sub><sup>2-</sup> ( $1.3 \times 10^{-4}$  mol/L). The concentration of ClO<sup>-</sup> was  $7.0 \times 10^{-5}$  mol/L.

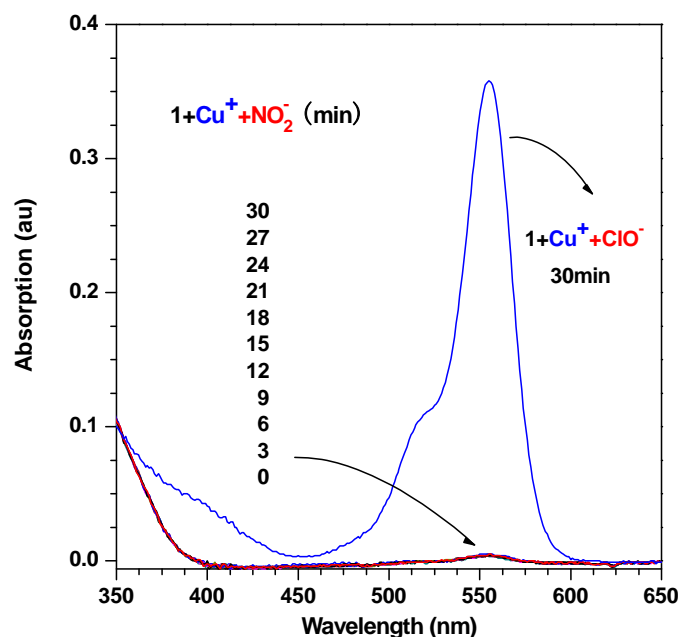

**Fig. S26** Absorption spectra of **1** ( $1.0 \times 10^{-5}$  mol/L), CuI ( $4.0 \times 10^{-5}$  mol/L) and Sodium Ascorbate ( $3.0 \times 10^{-6}$  mol/L) in Tris-HCl (10 mM, pH = 7.0) buffer containing 50% (v/v) water/CH<sub>3</sub>CN in the presence of NO<sub>2</sub><sup>-</sup> ( $1.3 \times 10^{-4}$  mol/L). The concentration of ClO<sup>-</sup> was  $7.0 \times 10^{-5}$  mol/L.

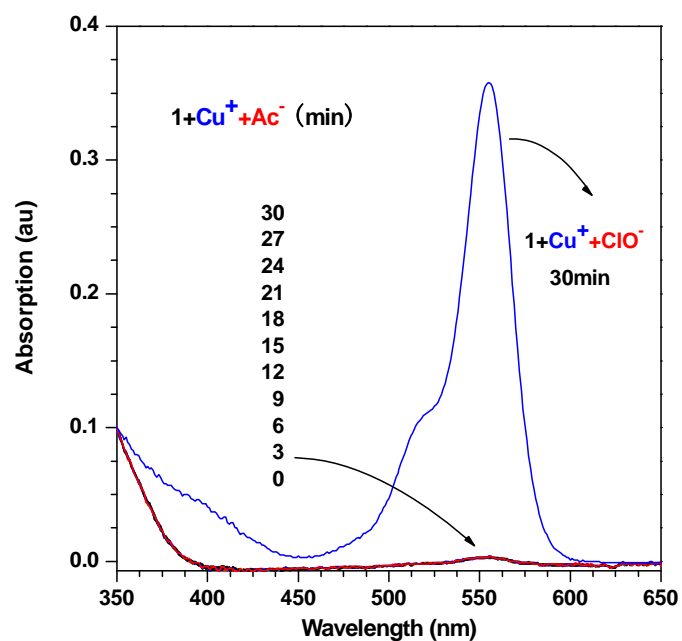

**Fig. S27** Absorption spectra of **1** ( $1.0 \times 10^{-5}$  mol/L), CuI ( $4.0 \times 10^{-5}$  mol/L) and Sodium Ascorbate ( $3.0 \times 10^{-6}$  mol/L) in Tris-HCl (10 mM, pH = 7.0) buffer containing 50% (v/v) water/CH<sub>3</sub>CN in the presence of Ac<sup>-</sup> ( $1.3 \times 10^{-4}$  mol/L). The concentration of ClO<sup>-</sup> was  $7.0 \times 10^{-5}$  mol/L.



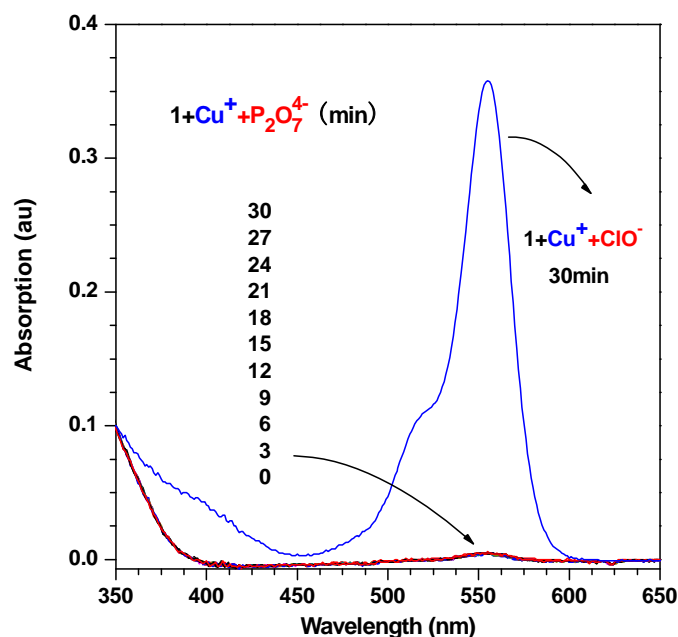

**Fig. S28** Absorption spectra of **1** ( $1.0 \times 10^{-5}$  mol/L), CuI ( $4.0 \times 10^{-5}$  mol/L) and Sodium Ascorbate ( $3.0 \times 10^{-6}$  mol/L) in Tris-HCl (10 mM, pH = 7.0) buffer containing 50% (v/v) water/CH<sub>3</sub>CN in the presence of P<sub>2</sub>O<sub>7</sub><sup>4-</sup> ( $1.3 \times 10^{-4}$  mol/L). The concentration of ClO<sup>-</sup> was  $7.0 \times 10^{-5}$  mol/L.

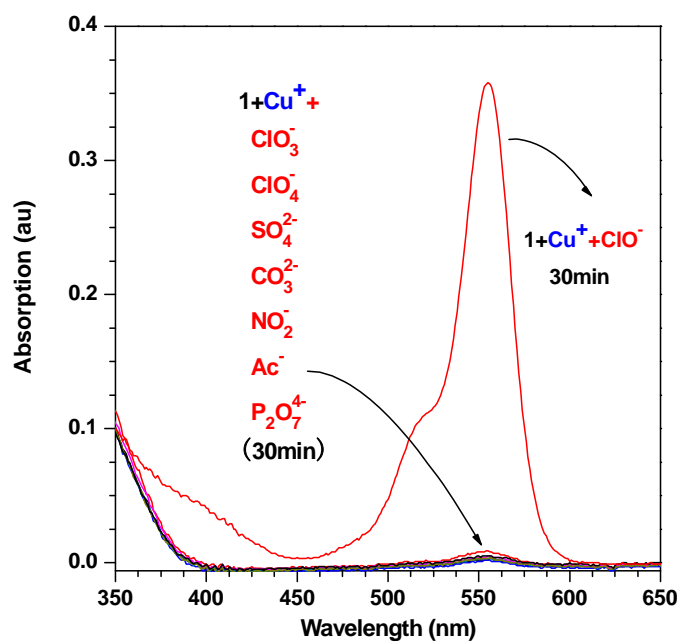

**Fig. S29** Absorption spectra of **1** ( $1.0 \times 10^{-5}$  mol/L), CuI ( $4.0 \times 10^{-5}$  mol/L) and Sodium Ascorbate ( $3.0 \times 10^{-6}$  mol/L) in Tris-HCl (10 mM, pH = 7.0) buffer containing 50% (v/v) water/CH<sub>3</sub>CN in the presence of different anions ( $1.3 \times 10^{-4}$  mol/L) after 30min. The concentration of ClO<sup>-</sup> was  $7.0 \times 10^{-5}$  mol/L.

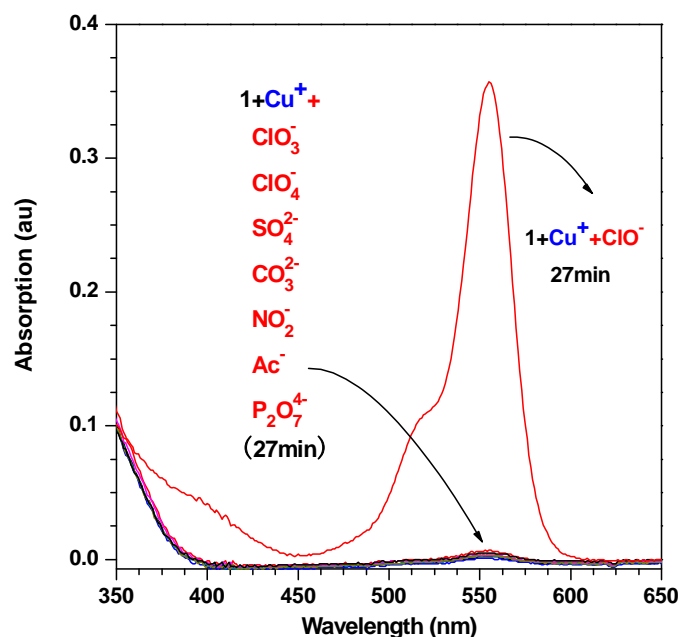

**Fig. S30** Absorption spectra of **1** ( $1.0 \times 10^{-5}$  mol/L), CuI ( $4.0 \times 10^{-5}$  mol/L) and Sodium Ascorbate ( $3.0 \times 10^{-6}$  mol/L) in Tris-HCl (10 mM, pH = 7.0) buffer containing 50% (v/v) water/CH<sub>3</sub>CN in the presence of different anions ( $1.3 \times 10^{-4}$  mol/L) after 27min. The concentration of ClO<sup>-</sup> was  $7.0 \times 10^{-5}$  mol/L.

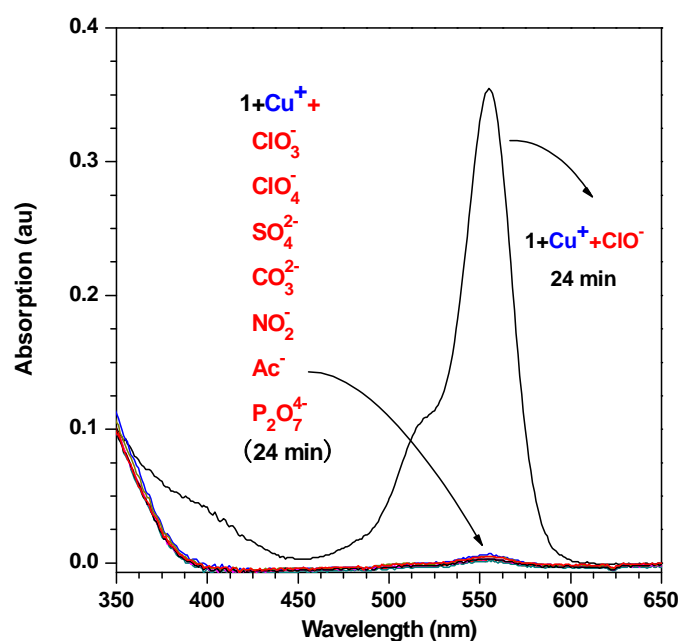

**Fig. S31** Absorption spectra of **1** ( $1.0 \times 10^{-5}$  mol/L), CuI ( $4.0 \times 10^{-5}$  mol/L) and Sodium Ascorbate ( $3.0 \times 10^{-6}$  mol/L) in Tris-HCl (10 mM, pH = 7.0) buffer containing 50% (v/v) water/CH<sub>3</sub>CN in the presence of different anions ( $1.3 \times 10^{-4}$  mol/L) after 24min. The concentration of ClO<sup>-</sup> was  $7.0 \times 10^{-5}$  mol/L.

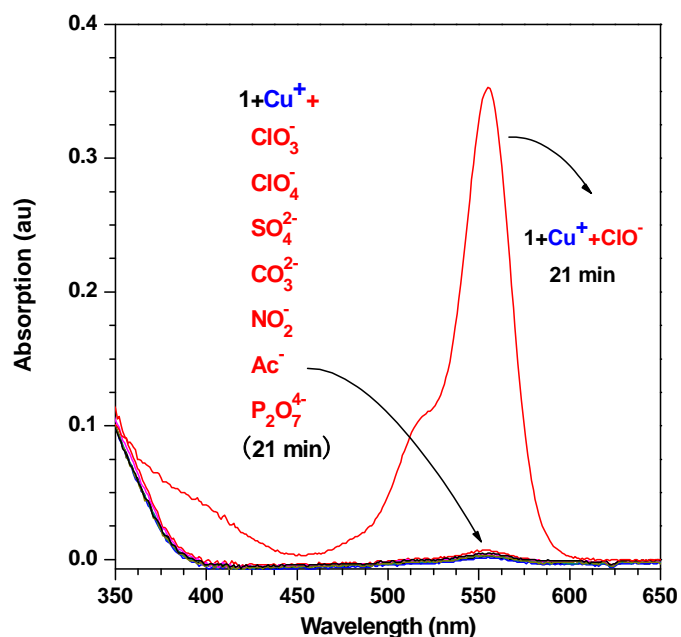

**Fig. S32** Absorption spectra of **1** ( $1.0 \times 10^{-5}$  mol/L), CuI ( $4.0 \times 10^{-5}$  mol/L) and Sodium Ascorbate ( $3.0 \times 10^{-6}$  mol/L) in Tris-HCl (10 mM, pH = 7.0) buffer containing 50% (v/v) water/CH<sub>3</sub>CN in the presence of different anions ( $1.3 \times 10^{-4}$  mol/L) after 21min. The concentration of ClO<sup>-</sup> was  $7.0 \times 10^{-5}$  mol/L.

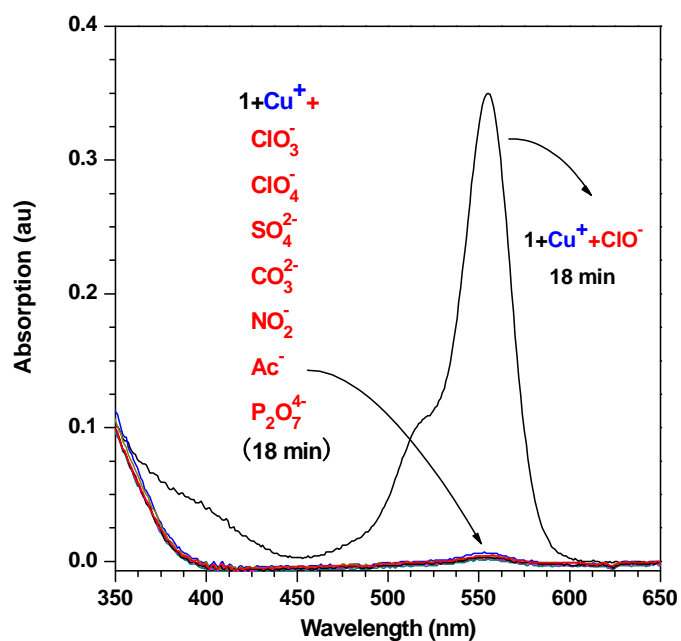

**Fig. S33** Absorption spectra of **1** ( $1.0 \times 10^{-5}$  mol/L), CuI ( $4.0 \times 10^{-5}$  mol/L) and Sodium Ascorbate ( $3.0 \times 10^{-6}$  mol/L) in Tris-HCl (10 mM, pH = 7.0) buffer containing 50% (v/v) water/CH<sub>3</sub>CN in the presence of different anions ( $1.3 \times 10^{-4}$  mol/L) after 18min. The concentration of ClO<sup>-</sup> was  $7.0 \times 10^{-5}$  mol/L.

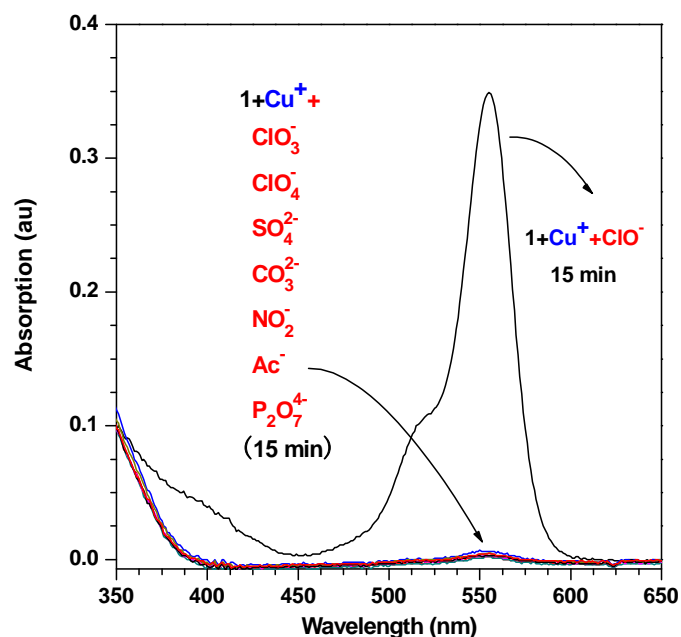

**Fig. S34** Absorption spectra of **1** ( $1.0 \times 10^{-5}$  mol/L), CuI ( $4.0 \times 10^{-5}$  mol/L) and Sodium Ascorbate ( $3.0 \times 10^{-6}$  mol/L) in Tris-HCl (10 mM, pH = 7.0) buffer containing 50% (v/v) water/ $\text{CH}_3\text{CN}$  in the presence of different anions ( $1.3 \times 10^{-4}$  mol/L) after 15min. The concentration of  $\text{ClO}^-$  was  $7.0 \times 10^{-5}$  mol/L.

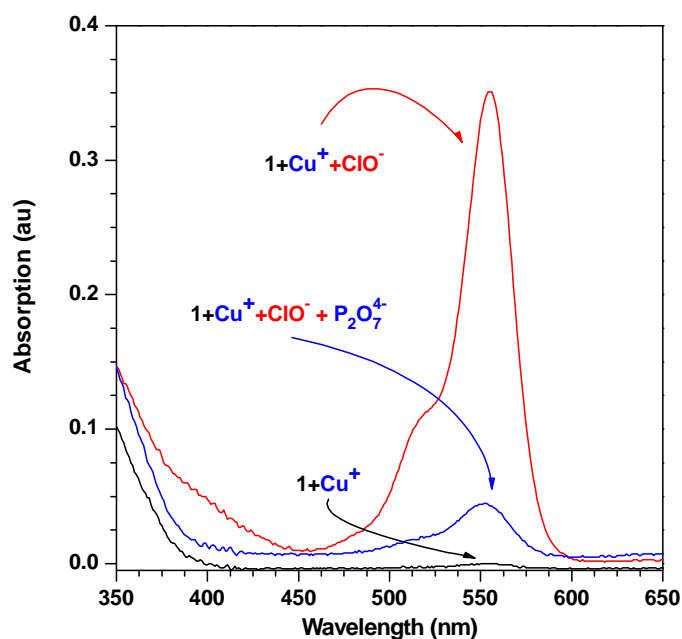

**Fig. S35** Absorption spectra of **1** ( $1.0 \times 10^{-5}$  mol/L), CuI ( $4.0 \times 10^{-5}$  mol/L) and Sodium Ascorbate ( $3.0 \times 10^{-6}$  mol/L) in Tris-HCl (10 mM, pH = 7.0) buffer containing 50% (v/v) water/ $\text{CH}_3\text{CN}$  in the presence of  $\text{P}_2\text{O}_7^{4-}$  ( $7.0 \times 10^{-5}$  mol/L) after 30min. The concentration of  $\text{ClO}^-$  was  $7.0 \times 10^{-5}$  mol/L.

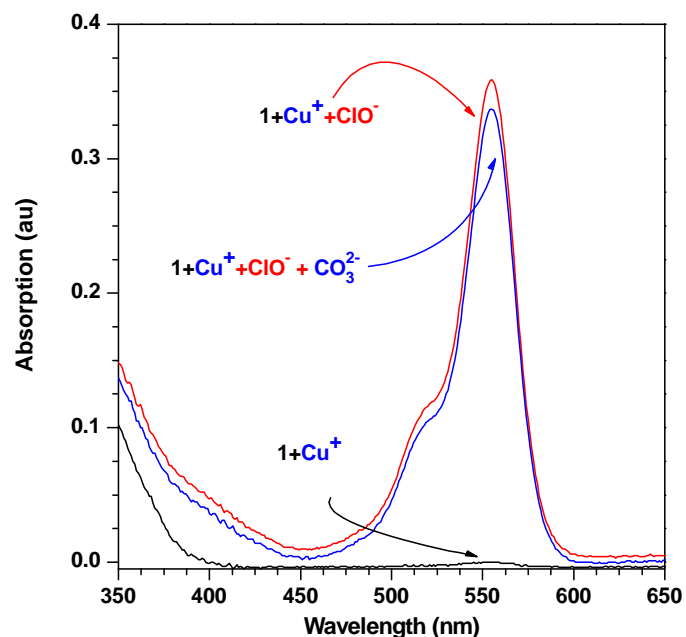

**Fig. S36** Absorption spectra of **1** ( $1.0 \times 10^{-5}$  mol/L), CuI ( $4.0 \times 10^{-5}$  mol/L) and Sodium Ascorbate ( $3.0 \times 10^{-6}$  mol/L) in Tris-HCl (10 mM, pH = 7.0) buffer containing 50% (v/v) water/CH<sub>3</sub>CN in the presence of CO<sub>3</sub><sup>2-</sup> ( $7.0 \times 10^{-5}$  mol/L) after 30min. The concentration of ClO<sup>-</sup> was  $7.0 \times 10^{-5}$  mol/L.

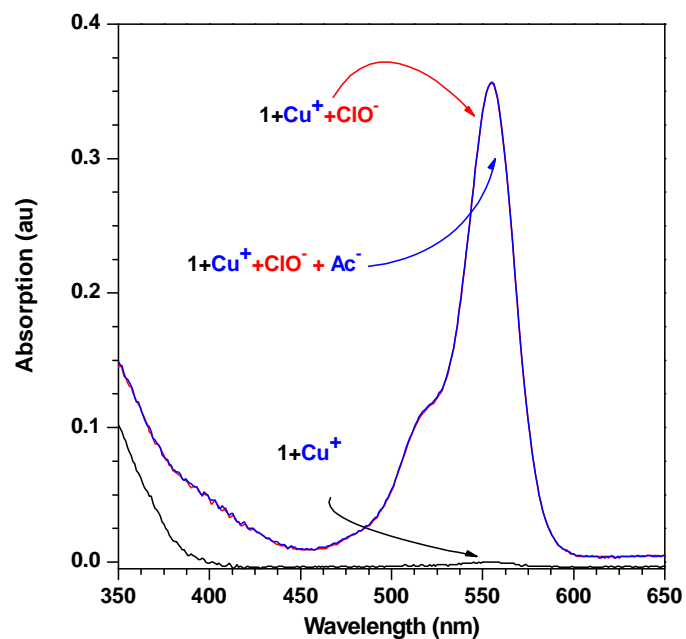

**Fig. S37** Absorption spectra of **1** ( $1.0 \times 10^{-5}$  mol/L), CuI ( $4.0 \times 10^{-5}$  mol/L) and Sodium Ascorbate ( $3.0 \times 10^{-6}$  mol/L) in Tris-HCl (10 mM, pH = 7.0) buffer containing 50% (v/v) water/CH<sub>3</sub>CN in the presence of Ac<sup>-</sup> ( $7.0 \times 10^{-5}$  mol/L) after 30min. The concentration of ClO<sup>-</sup> was  $7.0 \times 10^{-5}$  mol/L.

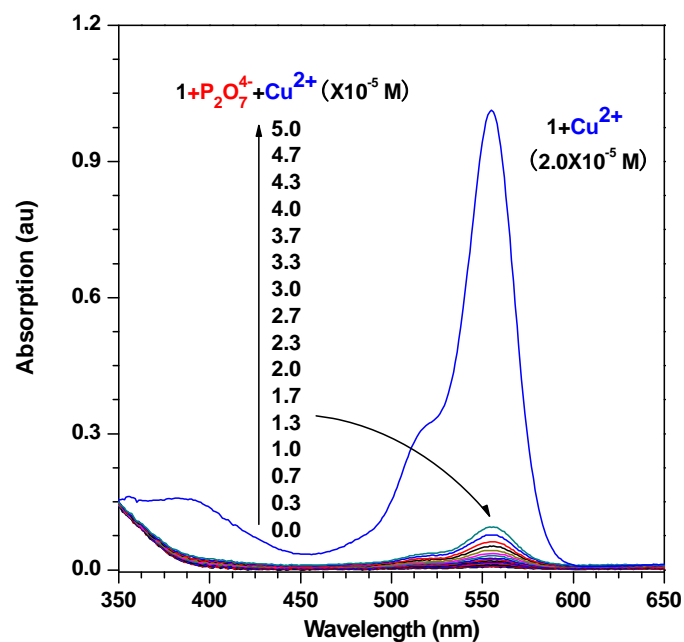

**Fig. S38** Absorption spectra of **1** ( $1.0 \times 10^{-5} \text{ mol/L}$ ),  $\text{P}_2\text{O}_7^{4-}$  ( $7.0 \times 10^{-5} \text{ mol/L}$ ) in Tris-HCl (10 mM, pH = 7.0) buffer containing 50% (v/v) water/ $\text{CH}_3\text{CN}$  in the presence of different amounts of  $\text{Cu}^{2+}$ .

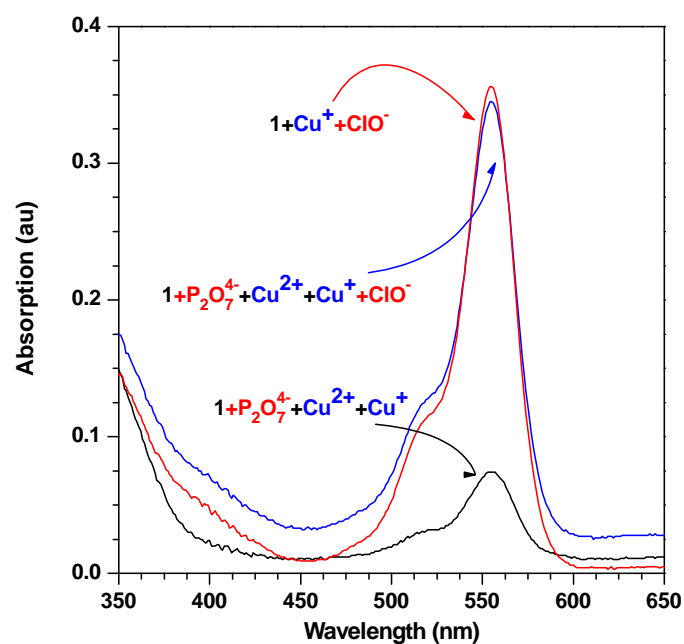

**Fig. S39** Absorption spectra of **1** ( $1.0 \times 10^{-5} \text{ mol/L}$ ),  $\text{P}_2\text{O}_7^{4-}$  ( $7.0 \times 10^{-5} \text{ mol/L}$ ),  $\text{Cu}^{2+}$  ( $5.0 \times 10^{-5} \text{ mol/L}$ ),  $\text{CuI}$  ( $4.0 \times 10^{-5} \text{ mol/L}$ ) and Sodium Ascorbate ( $3.0 \times 10^{-6} \text{ mol/L}$ ) in Tris-HCl (10 mM, pH = 7.0) buffer containing 50% (v/v) water/ $\text{CH}_3\text{CN}$  in the presence of  $\text{ClO}^-$  ( $7.0 \times 10^{-5} \text{ mol/L}$ ) after 30 min.

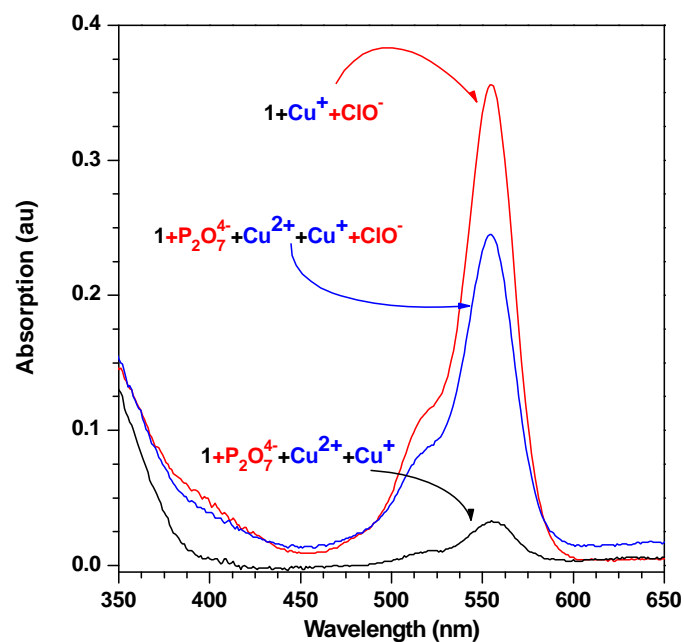

**Fig. S40** Absorption spectra of **1** ( $1.0 \times 10^{-5}$  mol/L),  $P_2O_7^{4-}$  ( $7.0 \times 10^{-5}$  mol/L),  $Cu^{2+}$  ( $4.0 \times 10^{-5}$  mol/L),  $CuI$  ( $4.0 \times 10^{-5}$  mol/L) and Sodium Ascorbate ( $3.0 \times 10^{-6}$  mol/L) in Tris-HCl (10 mM, pH = 7.0) buffer containing 50% (v/v) water/ $CH_3CN$  in the presence of  $ClO^-$  ( $7.0 \times 10^{-5}$  mol/L) after 30min.

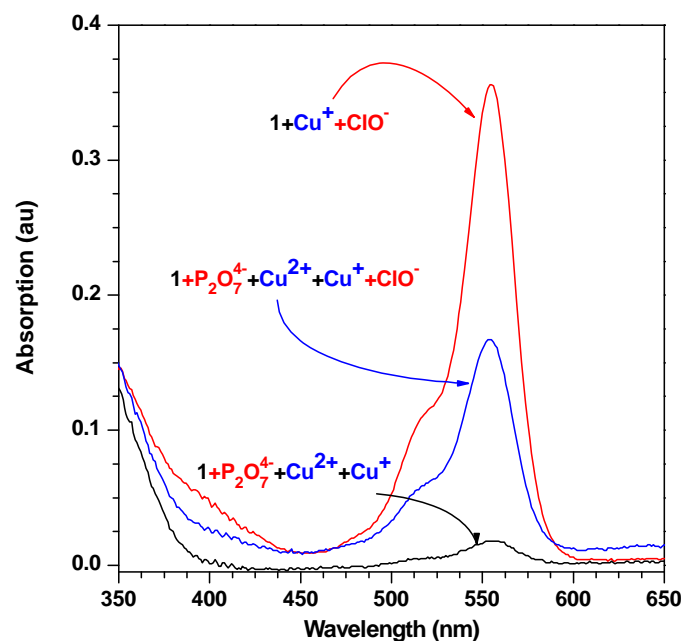

**Fig. S41** Absorption spectra of **1** ( $1.0 \times 10^{-5}$  mol/L),  $P_2O_7^{4-}$  ( $7.0 \times 10^{-5}$  mol/L),  $Cu^{2+}$  ( $3.0 \times 10^{-5}$  mol/L),  $CuI$  ( $4.0 \times 10^{-5}$  mol/L) and Sodium Ascorbate ( $3.0 \times 10^{-6}$  mol/L) in Tris-HCl (10 mM, pH = 7.0) buffer containing 50% (v/v) water/ $CH_3CN$  in the presence of  $ClO^-$  ( $7.0 \times 10^{-5}$  mol/L) after 30min.

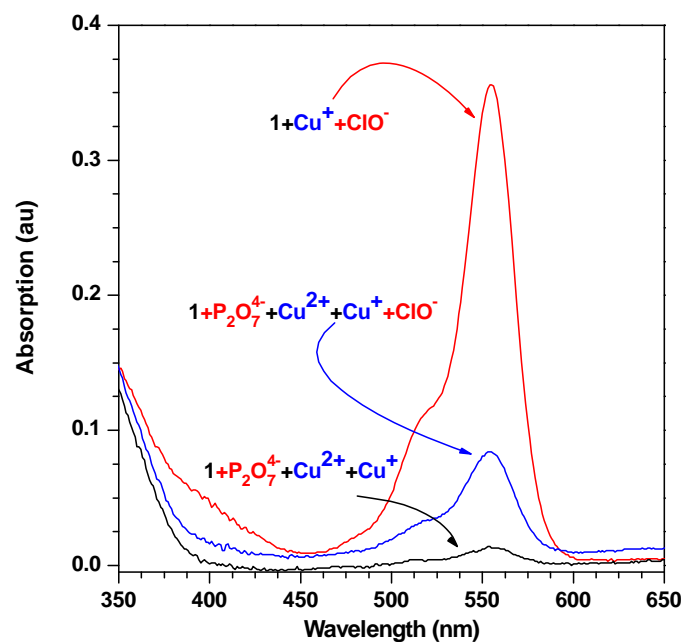

**Fig. S42** Absorption spectra of **1** ( $1.0 \times 10^{-5}$  mol/L),  $\text{P}_2\text{O}_7^{4-}$  ( $7.0 \times 10^{-5}$  mol/L),  $\text{Cu}^{2+}$  ( $2.0 \times 10^{-5}$  mol/L),  $\text{CuI}$  ( $4.0 \times 10^{-5}$  mol/L) and Sodium Ascorbate ( $3.0 \times 10^{-6}$  mol/L) in Tris-HCl (10 mM, pH = 7.0) buffer containing 50% (v/v) water/ $\text{CH}_3\text{CN}$  in the presence of  $\text{ClO}^-$  ( $7.0 \times 10^{-5}$  mol/L) after 30min.

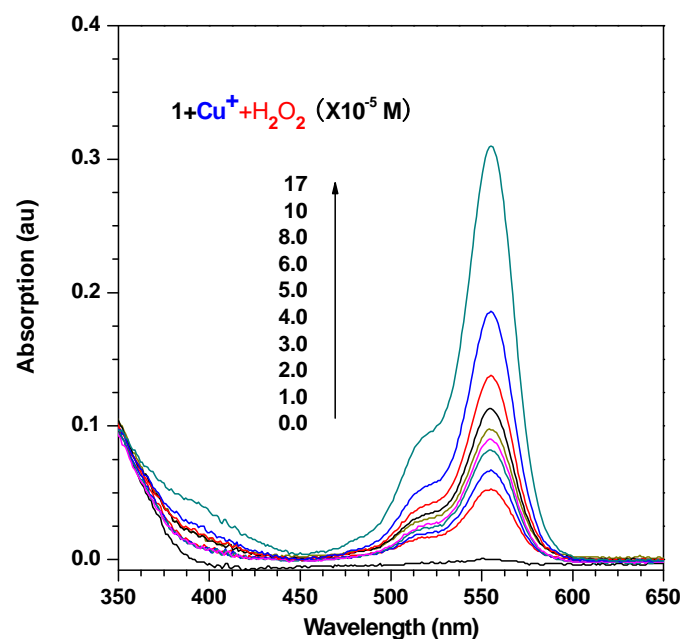

**Fig. S43** Absorption spectra of **1** ( $1.0 \times 10^{-5}$  mol/L),  $\text{CuI}$  ( $4.0 \times 10^{-5}$  mol/L) and Sodium Ascorbate ( $3.0 \times 10^{-6}$  mol/L) in Tris-HCl (10 mM, pH = 7.0) buffer containing 50% (v/v) water/ $\text{CH}_3\text{CN}$  in the presence of different amounts of  $\text{H}_2\text{O}_2$  after 30min.



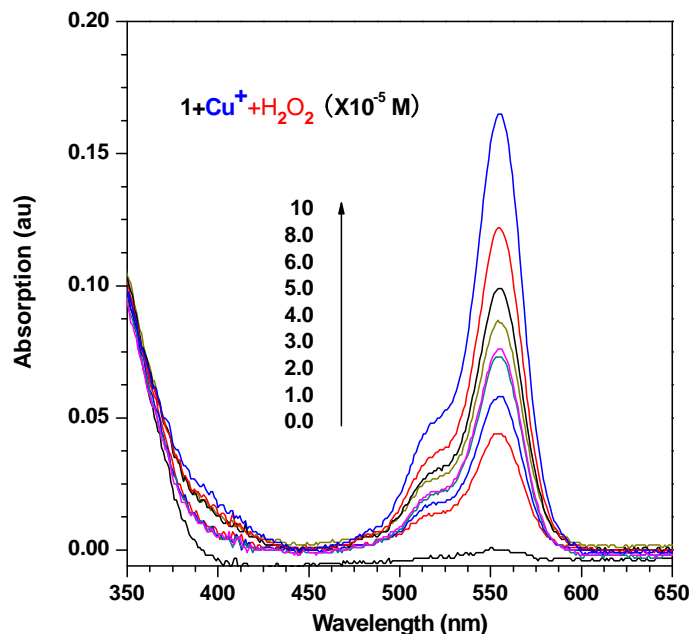

**Fig. S44** Absorption spectra of **1** ( $1.0 \times 10^{-5}$  mol/L), CuI ( $4.0 \times 10^{-5}$  mol/L) and Sodium Ascorbate ( $3.0 \times 10^{-6}$  mol/L) in Tris-HCl (10 mM, pH = 7.0) buffer containing 50% (v/v) water/CH<sub>3</sub>CN in the presence of different amounts of H<sub>2</sub>O<sub>2</sub> after 27min.

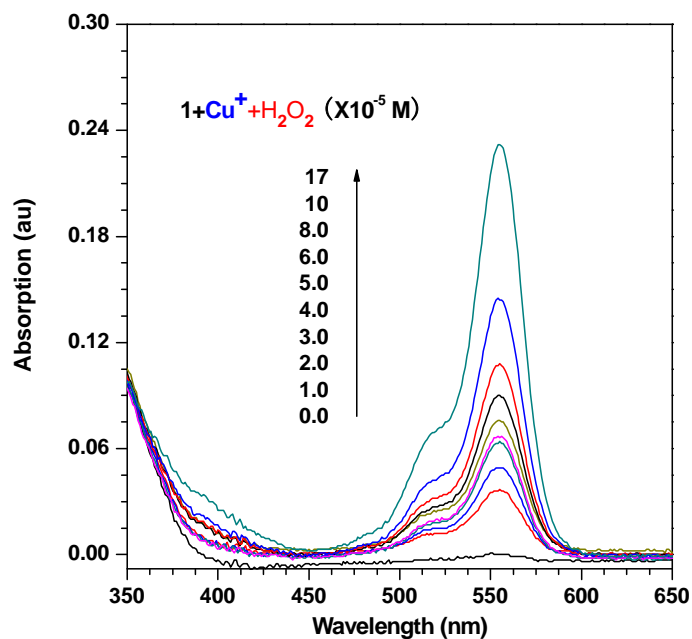

**Fig. S45** Absorption spectra of **1** ( $1.0 \times 10^{-5}$  mol/L), CuI ( $4.0 \times 10^{-5}$  mol/L) and Sodium Ascorbate ( $3.0 \times 10^{-6}$  mol/L) in Tris-HCl (10 mM, pH = 7.0) buffer containing 50% (v/v) water/CH<sub>3</sub>CN in the presence of different amounts of H<sub>2</sub>O<sub>2</sub> after 24min.

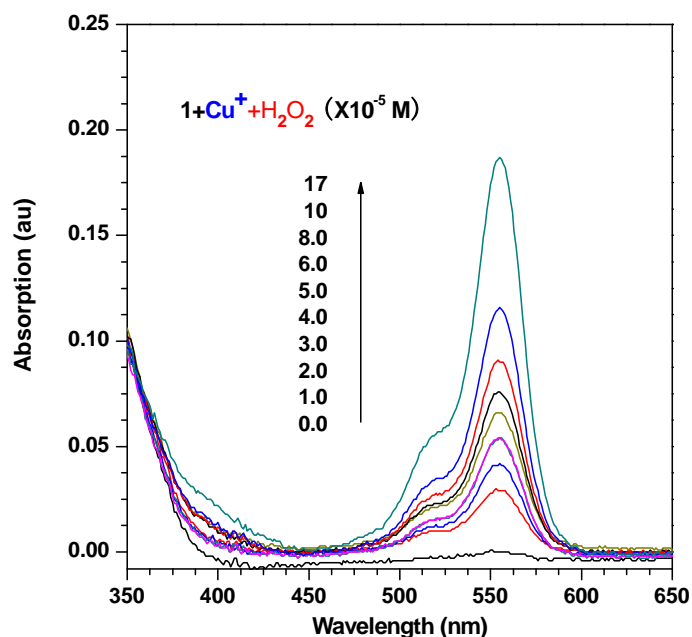

**Fig. S46** Absorption spectra of **1** ( $1.0 \times 10^{-5}$  mol/L), CuI ( $4.0 \times 10^{-5}$  mol/L) and Sodium Ascorbate ( $3.0 \times 10^{-6}$  mol/L) in Tris-HCl (10 mM, pH = 7.0) buffer containing 50% (v/v) water/CH<sub>3</sub>CN in the presence of different amounts of H<sub>2</sub>O<sub>2</sub> after 21 min.

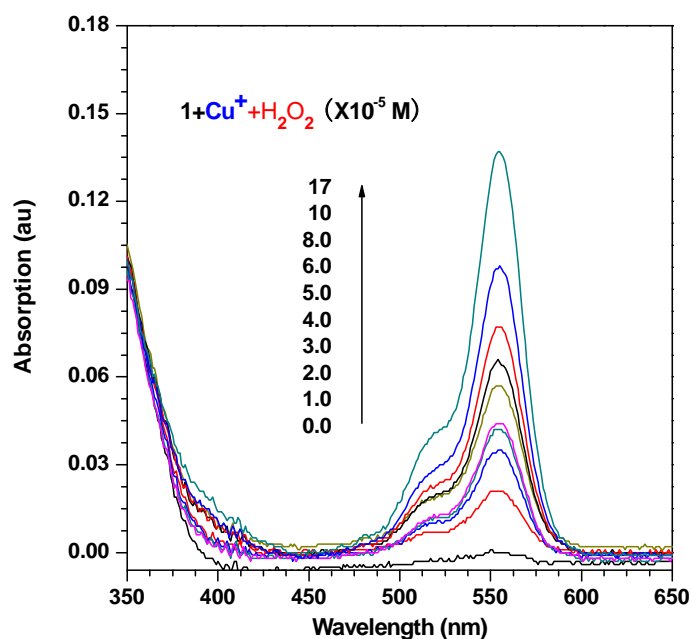

**Fig. S47** Absorption spectra of **1** ( $1.0 \times 10^{-5}$  mol/L), CuI ( $4.0 \times 10^{-5}$  mol/L) and Sodium Ascorbate ( $3.0 \times 10^{-6}$  mol/L) in Tris-HCl (10 mM, pH = 7.0) buffer containing 50% (v/v) water/CH<sub>3</sub>CN in the presence of different amounts of H<sub>2</sub>O<sub>2</sub> after 18 min.

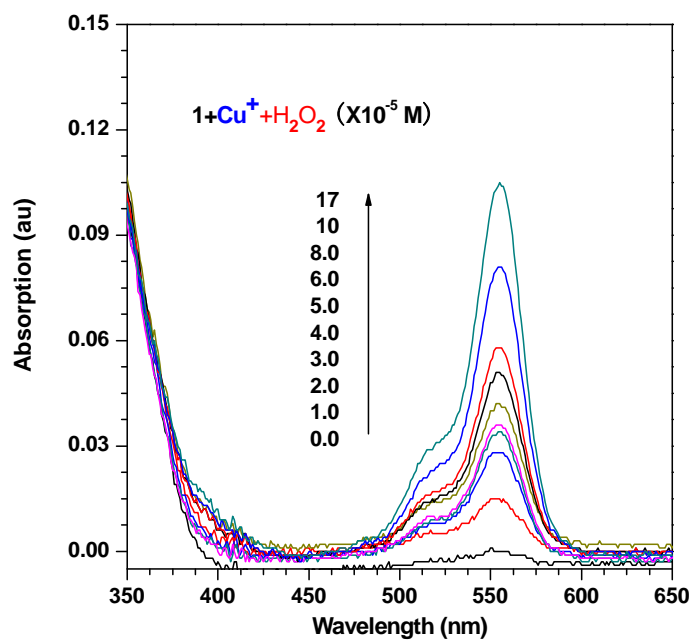

**Fig. S48** Absorption spectra of **1** ( $1.0 \times 10^{-5}$  mol/L), CuI ( $4.0 \times 10^{-5}$  mol/L) and Sodium Ascorbate ( $3.0 \times 10^{-6}$  mol/L) in Tris-HCl (10 mM, pH = 7.0) buffer containing 50% (v/v) water/CH<sub>3</sub>CN in the presence of different amounts of H<sub>2</sub>O<sub>2</sub> after 15 min.

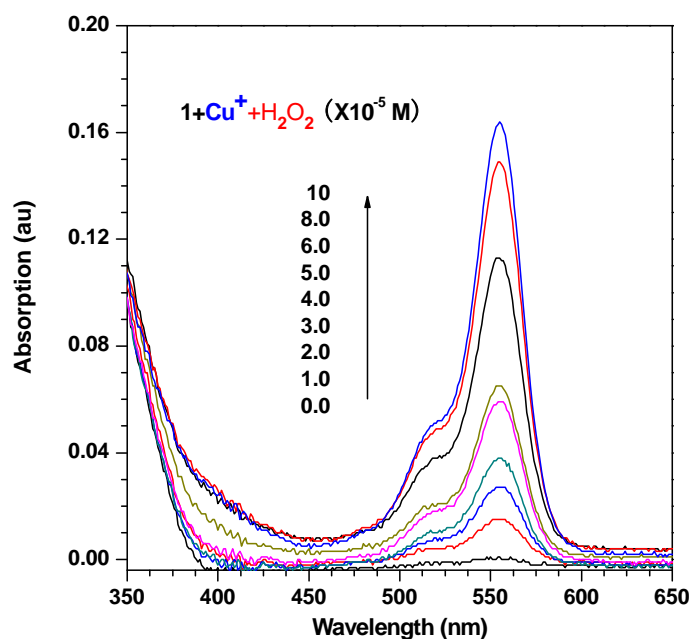

**Fig. S49** Absorption spectra of **1** ( $1.0 \times 10^{-5}$  mol/L), CuI ( $6.0 \times 10^{-5}$  mol/L) and Sodium Ascorbate ( $3.0 \times 10^{-6}$  mol/L) in Tris-HCl (10 mM, pH = 7.0) buffer containing 50% (v/v) water/CH<sub>3</sub>CN in the presence of different amounts of H<sub>2</sub>O<sub>2</sub> after 21 min.

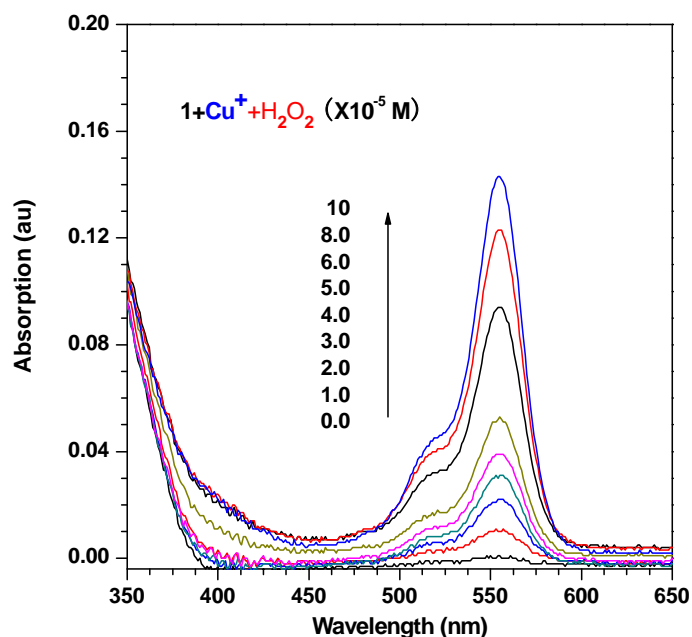

**Fig. S50** Absorption spectra of **1** ( $1.0 \times 10^{-5}$  mol/L), CuI ( $6.0 \times 10^{-5}$  mol/L) and Sodium Ascorbate ( $3.0 \times 10^{-6}$  mol/L) in Tris-HCl (10 mM, pH = 7.0) buffer containing 50% (v/v) water/CH<sub>3</sub>CN in the presence of different amounts of H<sub>2</sub>O<sub>2</sub> after 18 min.

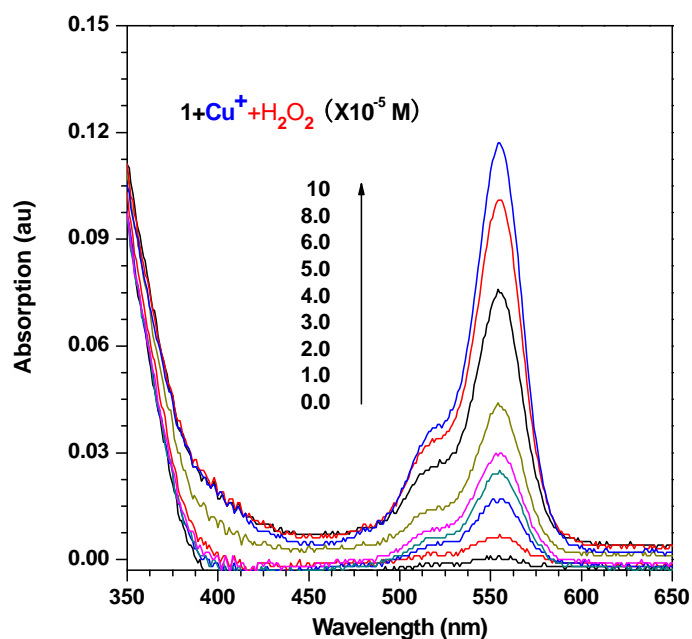

**Fig. S51** Absorption spectra of **1** ( $1.0 \times 10^{-5}$  mol/L), CuI ( $6.0 \times 10^{-5}$  mol/L) and Sodium Ascorbate ( $3.0 \times 10^{-6}$  mol/L) in Tris-HCl (10 mM, pH = 7.0) buffer containing 50% (v/v) water/CH<sub>3</sub>CN in the presence of different amounts of H<sub>2</sub>O<sub>2</sub> after 15 min.

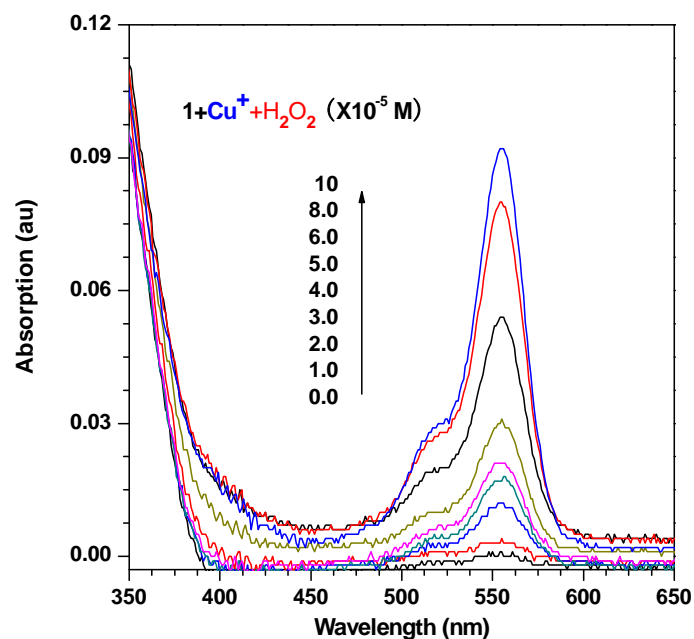

**Fig. S52** Absorption spectra of **1** ( $1.0 \times 10^{-5}$  mol/L), CuI ( $6.0 \times 10^{-5}$  mol/L) and Sodium Ascorbate ( $3.0 \times 10^{-6}$  mol/L) in Tris-HCl (10 mM, pH = 7.0) buffer containing 50% (v/v) water/CH<sub>3</sub>CN in the presence of different amounts of H<sub>2</sub>O<sub>2</sub> after 12 min.

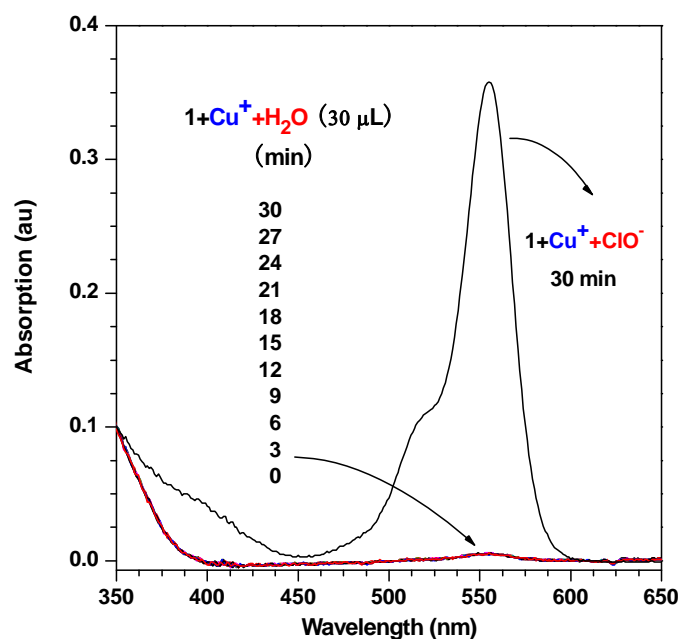

**Fig. S53** Absorption spectra of **1** ( $1.0 \times 10^{-5}$  mol/L), CuI ( $4.0 \times 10^{-5}$  mol/L) and Sodium Ascorbate ( $3.0 \times 10^{-6}$  mol/L) in Tris-HCl (10 mM, pH = 7.0) buffer containing 50% (v/v) water/CH<sub>3</sub>CN in the presence of 30 μL water. The concentration of ClO<sup>-</sup> was  $7.0 \times 10^{-5}$  mol/L.

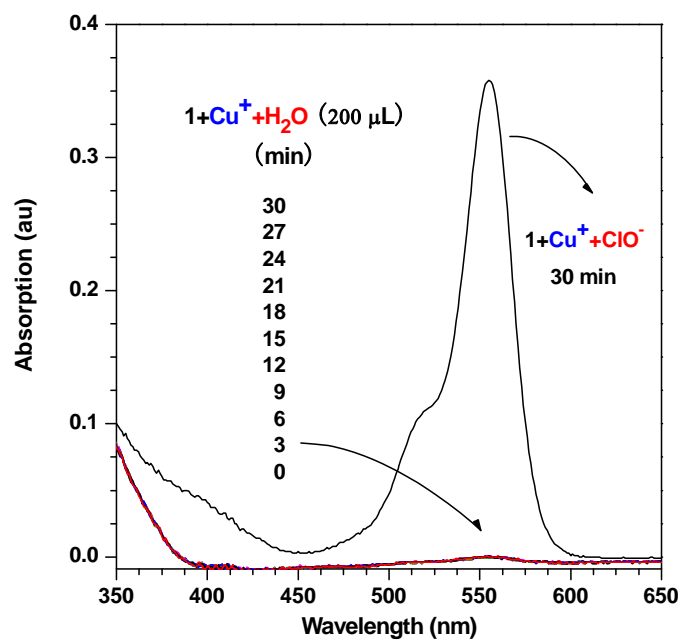

**Fig. S54** Absorption spectra of **1** ( $1.0 \times 10^{-5}$  mol/L), CuI ( $4.0 \times 10^{-5}$  mol/L) and Sodium Ascorbate ( $3.0 \times 10^{-6}$  mol/L) in Tris-HCl (10 mM, pH = 7.0) buffer containing 50% (v/v) water/CH<sub>3</sub>CN in the presence of 200 μL water. The concentration of ClO<sup>-</sup> was  $7.0 \times 10^{-5}$  mol/L.

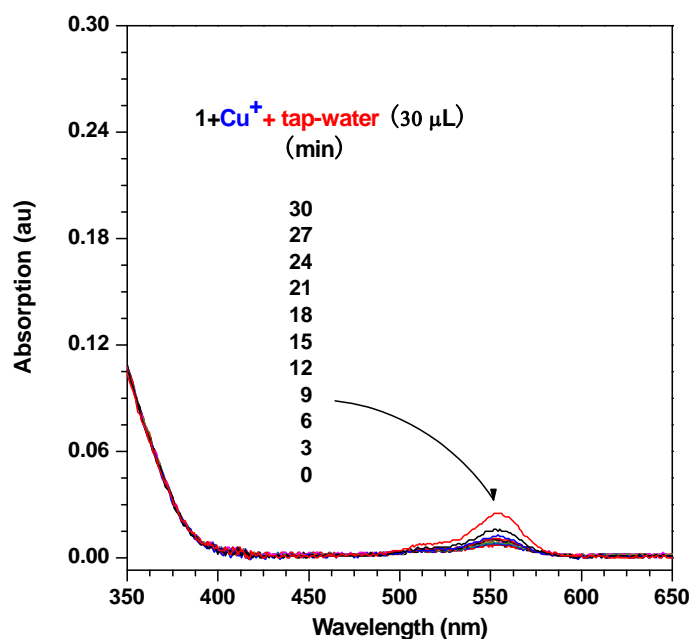

**Fig. S55** Absorption spectra of **1** ( $1.0 \times 10^{-5}$  mol/L), CuI ( $4.0 \times 10^{-5}$  mol/L) and Sodium Ascorbate ( $3.0 \times 10^{-6}$  mol/L) in Tris-HCl (10 mM, pH = 7.0) buffer containing 50% (v/v) water/CH<sub>3</sub>CN in the presence of 30 μL tap-water.

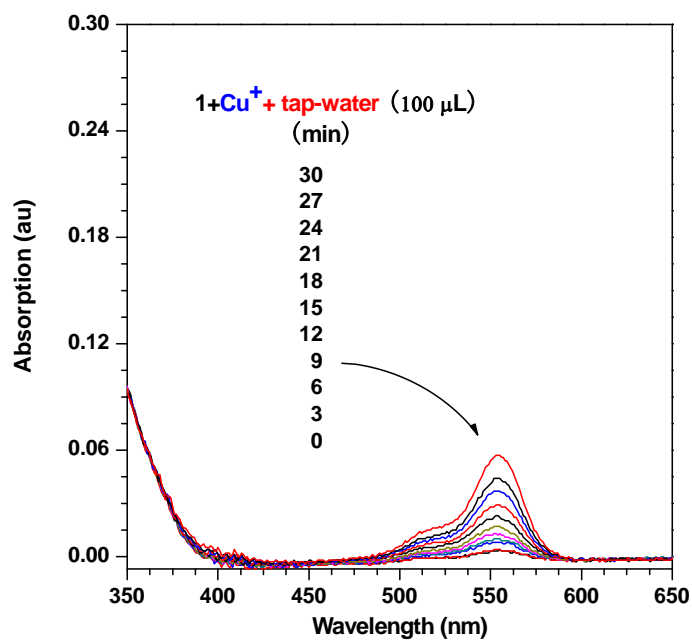

**Fig. S56** Absorption spectra of **1** ( $1.0 \times 10^{-5}$  mol/L), CuI ( $4.0 \times 10^{-5}$  mol/L) and Sodium Ascorbate ( $3.0 \times 10^{-6}$  mol/L) in Tris-HCl (10 mM, pH = 7.0) buffer containing 50% (v/v) water/CH<sub>3</sub>CN in the presence of 100 µL tap-water.

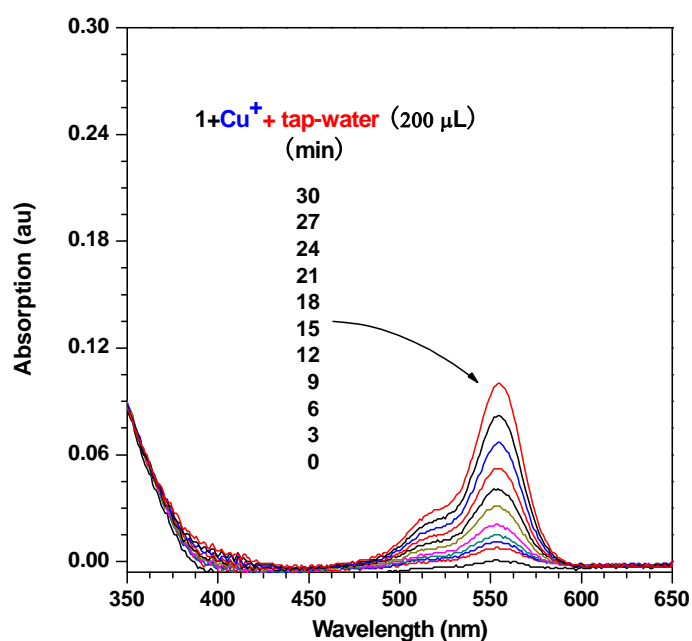

**Fig. S57** Absorption spectra of **1** ( $1.0 \times 10^{-5}$  mol/L), CuI ( $4.0 \times 10^{-5}$  mol/L) and Sodium Ascorbate ( $3.0 \times 10^{-6}$  mol/L) in Tris-HCl (10 mM, pH = 7.0) buffer containing 50% (v/v) water/CH<sub>3</sub>CN in the presence of 200 µL tap-water.

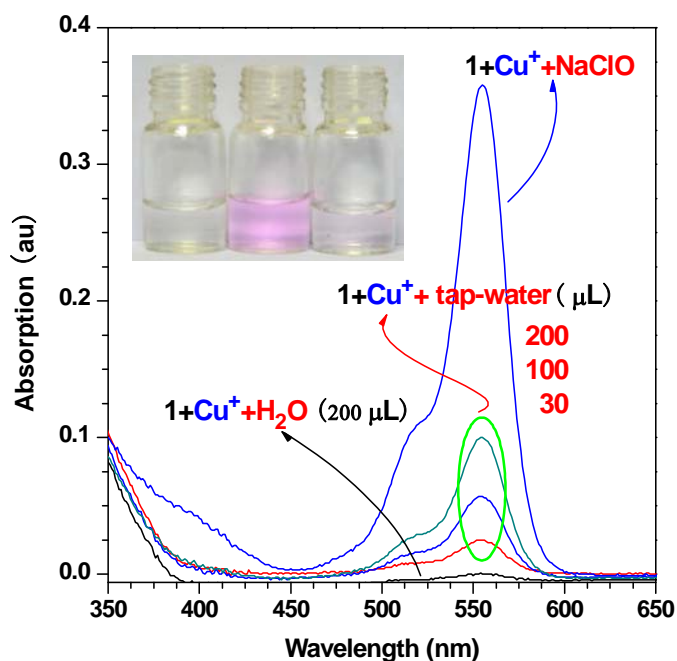

**Fig. S58** Absorption spectra of **1** ( $1.0 \times 10^{-5}$  M), CuI ( $4.0 \times 10^{-5}$  M) and Sodium Ascorbate ( $3.0 \times 10^{-6}$  M) in Tris-HCl (10 mM, pH = 7.0) buffer containing 50% (v/v) water/CH<sub>3</sub>CN in the presence of different amount tap-water. Inset: Photograph of **1**+Cu<sup>+</sup>, **1**+Cu<sup>+</sup>+tap water, **1**+Cu<sup>+</sup>+H<sub>2</sub>O.

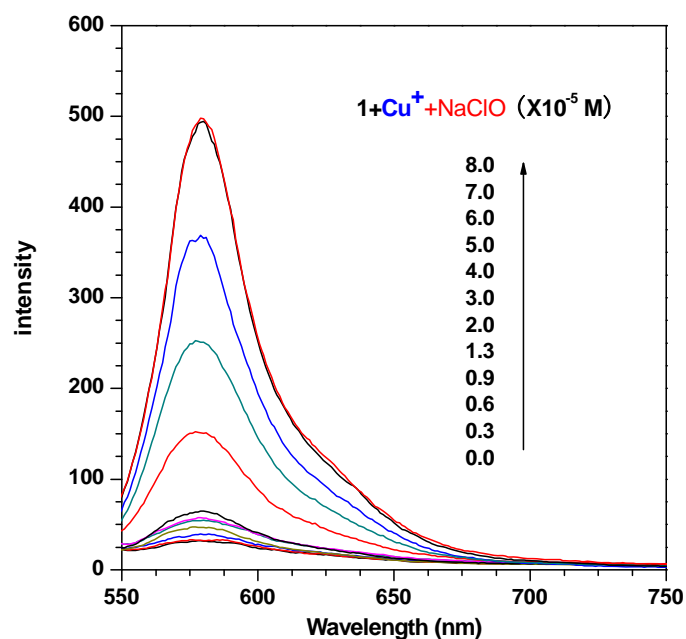

**Fig. S59** Fluorescence Emission spectra of **1** ( $1.0 \times 10^{-5}$  mol/L), CuI ( $4.0 \times 10^{-5}$  mol/L) and Sodium Ascorbate ( $3.0 \times 10^{-6}$  mol/L) in Tris-HCl (10 mM, pH = 7.0) buffer containing 50% (v/v) water/CH<sub>3</sub>CN in the presence of different amounts of NaClO after 30min. Excitation wavelength (nm):520.



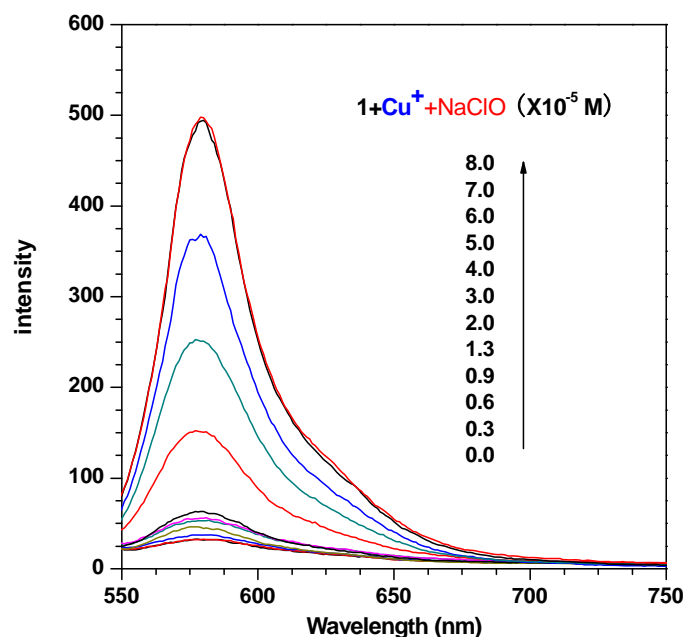

**Fig. S60** Fluorescence Emission spectra of **1** ( $1.0 \times 10^{-5}$  mol/L), CuI ( $4.0 \times 10^{-5}$  mol/L) and Sodium Ascorbate ( $3.0 \times 10^{-6}$  mol/L) in Tris-HCl (10mM, pH = 7.0) buffer containing 50% (v/v) water/ $\text{CH}_3\text{CN}$  in the presence of different amounts of NaClO after 27min. Excitation wavelength (nm):520.

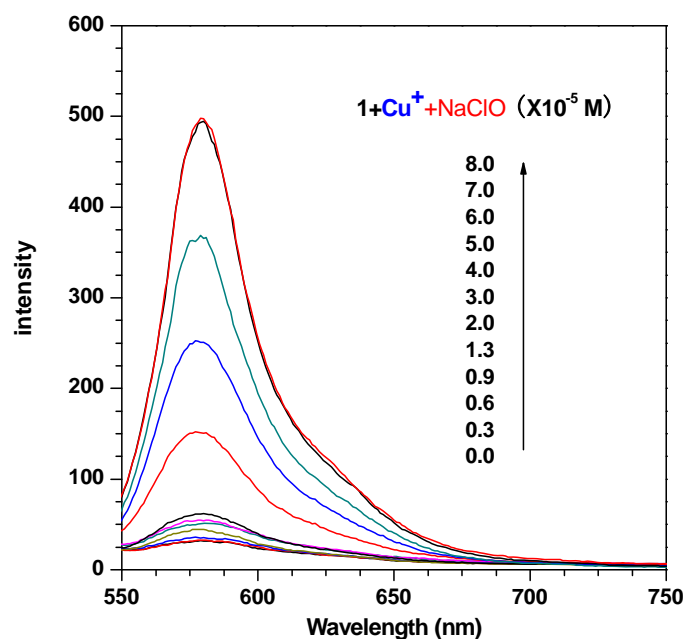

**Fig. S61** Fluorescence Emission spectra of **1** ( $1.0 \times 10^{-5}$  mol/L), CuI ( $4.0 \times 10^{-5}$  mol/L) and Sodium Ascorbate ( $3.0 \times 10^{-6}$  mol/L) in Tris-HCl (10mM, pH = 7.0) buffer containing 50% (v/v) water/ $\text{CH}_3\text{CN}$  in the presence of different amounts of NaClO after 24min. Excitation wavelength (nm):520.

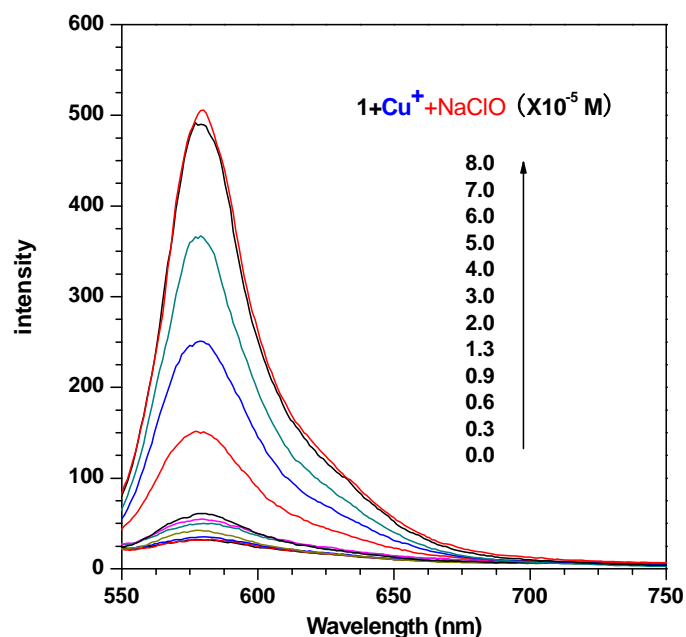

**Fig. S62** Fluorescence Emission spectra of **1** ( $1.0 \times 10^{-5}$  mol/L), CuI ( $4.0 \times 10^{-5}$  mol/L) and Sodium Ascorbate ( $3.0 \times 10^{-6}$  mol/L) in Tris-HCl (10mM, pH = 7.0) buffer containing 50% (v/v) water/ $\text{CH}_3\text{CN}$  in the presence of different amounts of NaClO after 21min. Excitation wavelength (nm):520.

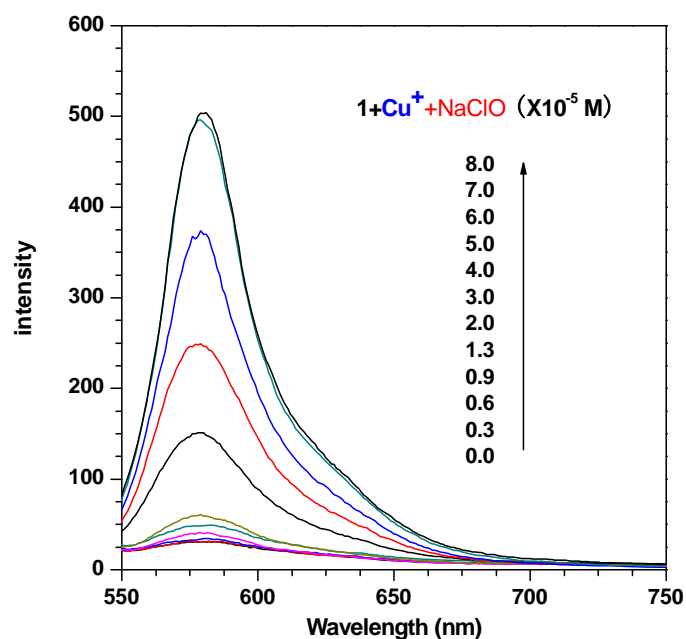

**Fig. S63** Fluorescence Emission spectra of **1** ( $1.0 \times 10^{-5}$  mol/L), CuI ( $4.0 \times 10^{-5}$  mol/L) and Sodium Ascorbate ( $3.0 \times 10^{-6}$  mol/L) in Tris-HCl (10mM, pH = 7.0) buffer containing 50% (v/v) water/ $\text{CH}_3\text{CN}$  in the presence of different amounts of NaClO after 18min. Excitation wavelength (nm):520.

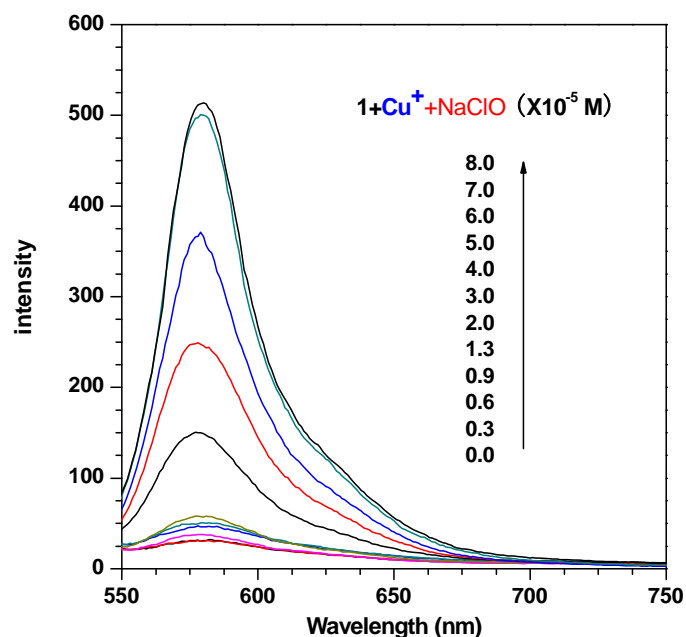

**Fig. S64** Fluorescence Emission spectra of **1** ( $1.0 \times 10^{-5}$  mol/L), CuI ( $4.0 \times 10^{-5}$  mol/L) and Sodium Ascorbate ( $3.0 \times 10^{-6}$  mol/L) in Tris-HCl (10mM, pH = 7.0) buffer containing 50% (v/v) water/CH<sub>3</sub>CN in the presence of different amounts of NaClO after 15min. Excitation wavelength (nm):520.

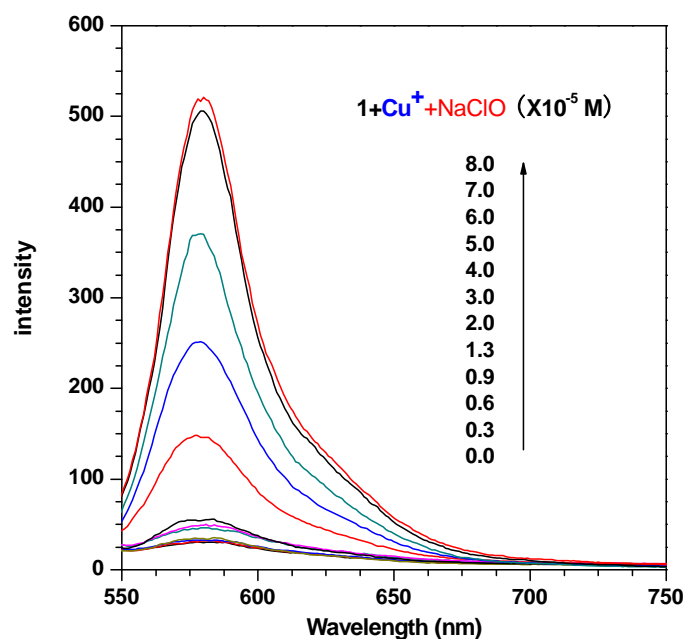

**Fig. S65** Fluorescence Emission spectra of **1** ( $1.0 \times 10^{-5}$  mol/L), CuI ( $4.0 \times 10^{-5}$  mol/L) and Sodium Ascorbate ( $3.0 \times 10^{-6}$  mol/L) in Tris-HCl (10mM, pH = 7.0) buffer containing 50% (v/v) water/CH<sub>3</sub>CN in the presence of different amounts of NaClO after 12min. Excitation wavelength (nm):520.

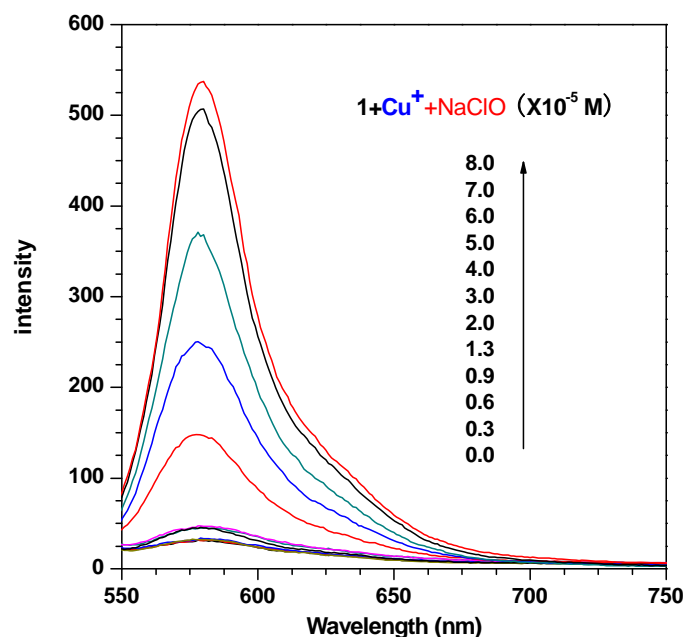

**Fig. S66** Fluorescence Emission spectra of **1** ( $1.0 \times 10^{-5}$  mol/L), CuI ( $4.0 \times 10^{-5}$  mol/L) and Sodium Ascorbate ( $3.0 \times 10^{-6}$  mol/L) in Tris-HCl (10mM, pH = 7.0) buffer containing 50% (v/v) water/CH<sub>3</sub>CN in the presence of different amounts of NaClO after 9min. Excitation wavelength (nm):520.

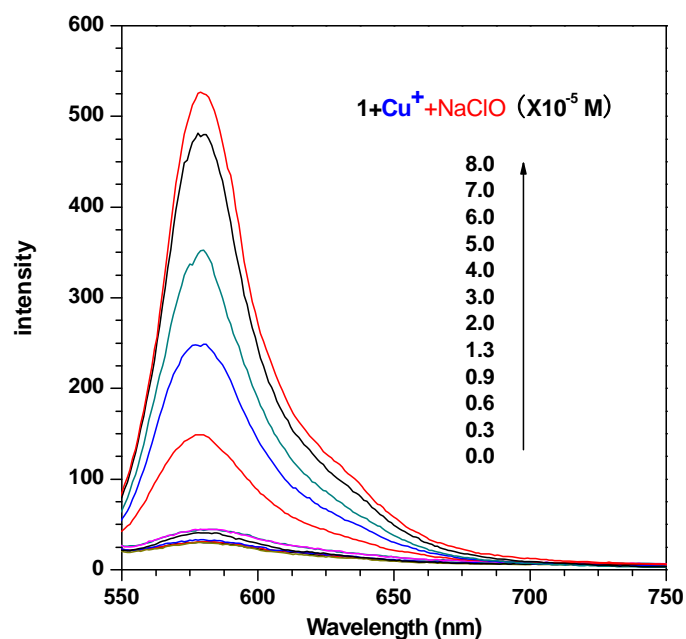

**Fig. S67** Fluorescence Emission spectra of **1** ( $1.0 \times 10^{-5}$  mol/L), CuI ( $4.0 \times 10^{-5}$  mol/L) and Sodium Ascorbate ( $3.0 \times 10^{-6}$  mol/L) in Tris-HCl (10mM, pH = 7.0) buffer containing 50% (v/v) water/CH<sub>3</sub>CN in the presence of different amounts of NaClO after 6min. Excitation wavelength (nm):520.

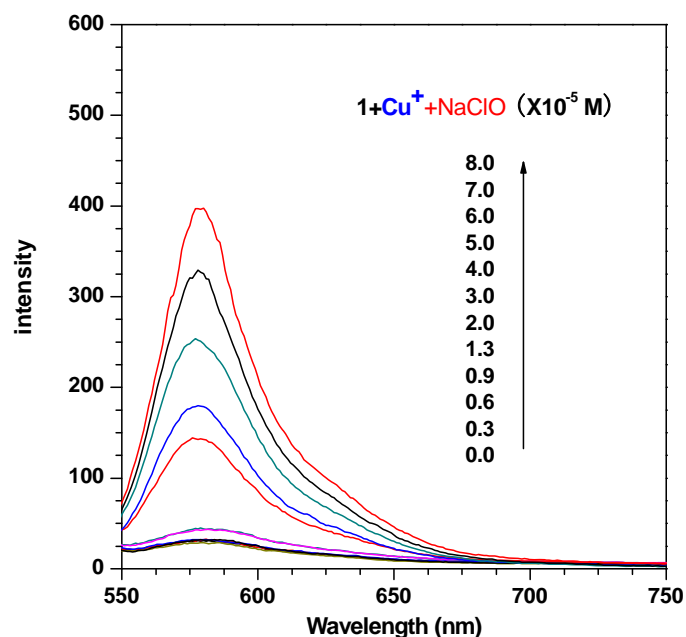

**Fig. S68** Fluorescence Emission spectra of **1** ( $1.0 \times 10^{-5}$  mol/L), CuI ( $4.0 \times 10^{-5}$  mol/L) and Sodium Ascorbate ( $3.0 \times 10^{-6}$  mol/L) in Tris-HCl (10mM, pH = 7.0) buffer containing 50% (v/v) water/CH<sub>3</sub>CN in the presence of different amounts of NaClO after 3min. Excitation wavelength (nm):520.

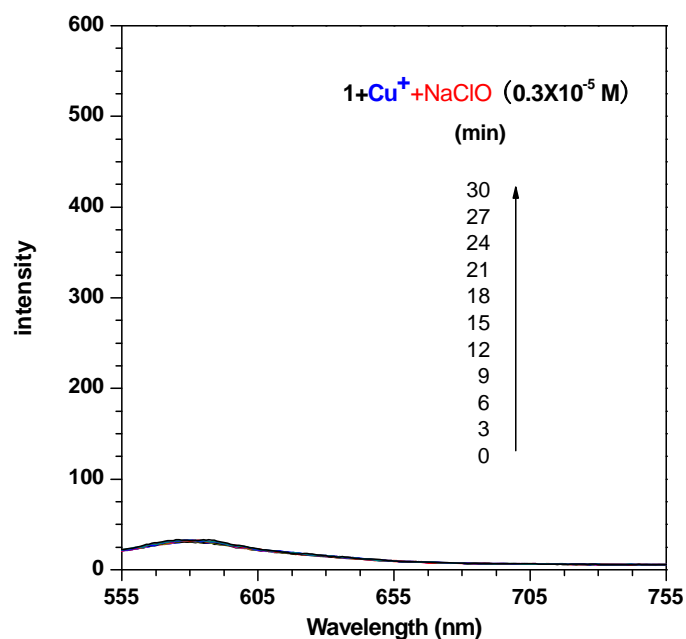

**Fig. S69** Fluorescence Emission spectra of **1** ( $1.0 \times 10^{-5}$  mol/L), CuI ( $4.0 \times 10^{-5}$  mol/L) and Sodium Ascorbate ( $3.0 \times 10^{-6}$  mol/L) in Tris-HCl (10mM, pH = 7.0) buffer containing 50% (v/v) water/CH<sub>3</sub>CN in the presence of NaClO ( $3.0 \times 10^{-6}$  mol/L) at different time. Excitation wavelength (nm):520.

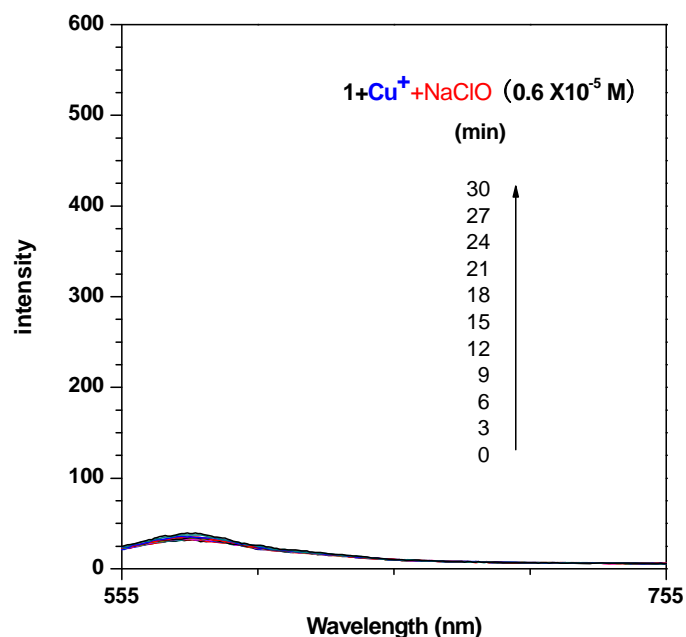

**Fig. S70** Fluorescence Emission spectra of **1** ( $1.0 \times 10^{-5}$  mol/L), CuI ( $4.0 \times 10^{-5}$  mol/L) and Sodium Ascorbate ( $3.0 \times 10^{-6}$  mol/L) in Tris-HCl (10mM, pH = 7.0) buffer containing 50% (v/v) water/CH<sub>3</sub>CN in the presence of NaClO ( $6.0 \times 10^{-6}$  mol/L) at different time. Excitation wavelength (nm):520.

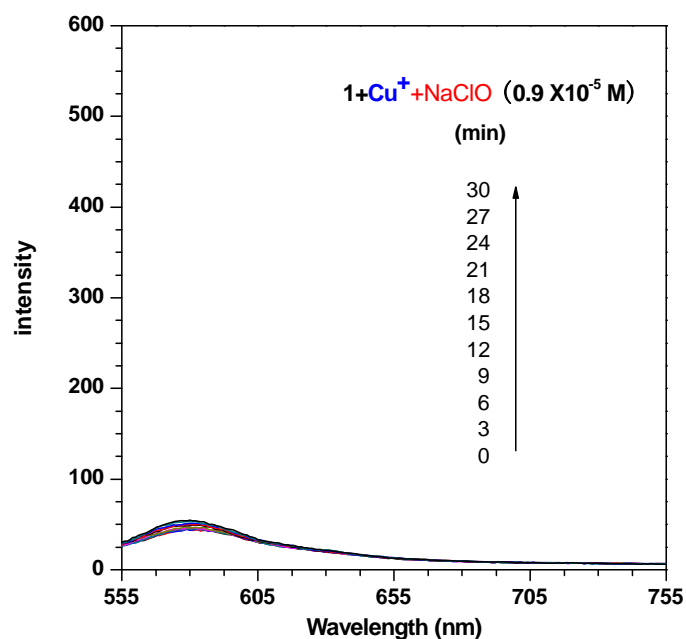

**Fig. S71** Fluorescence Emission spectra of **1** ( $1.0 \times 10^{-5}$  mol/L), CuI ( $4.0 \times 10^{-5}$  mol/L) and Sodium Ascorbate ( $3.0 \times 10^{-6}$  mol/L) in Tris-HCl (10mM, pH = 7.0) buffer containing 50% (v/v) water/CH<sub>3</sub>CN in the presence of NaClO ( $9.0 \times 10^{-6}$  mol/L) at different time. Excitation wavelength (nm):520.

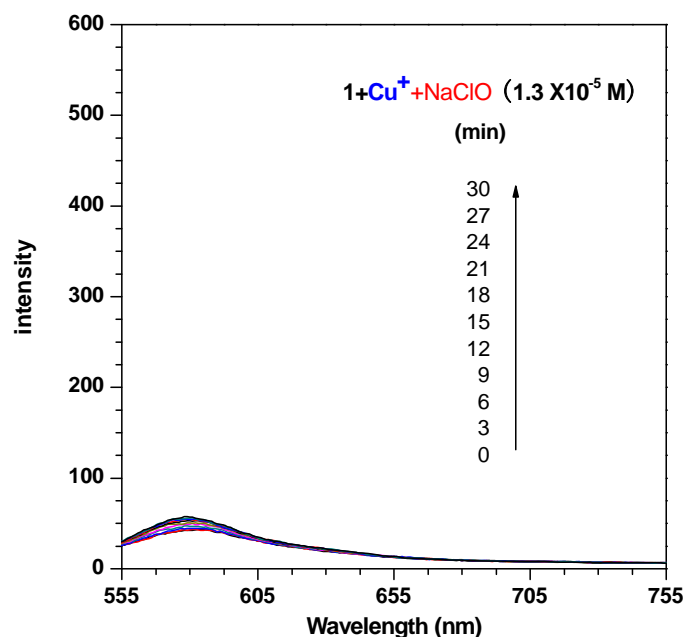

**Fig. S72** Fluorescence Emission spectra of **1** ( $1.0 \times 10^{-5}$  mol/L), CuI ( $4.0 \times 10^{-5}$  mol/L) and Sodium Ascorbate ( $3.0 \times 10^{-6}$  mol/L) in Tris-HCl (10mM, pH = 7.0) buffer containing 50% (v/v) water/CH<sub>3</sub>CN in the presence of NaClO ( $1.3 \times 10^{-5}$  mol/L) at different time. Excitation wavelength (nm):520.

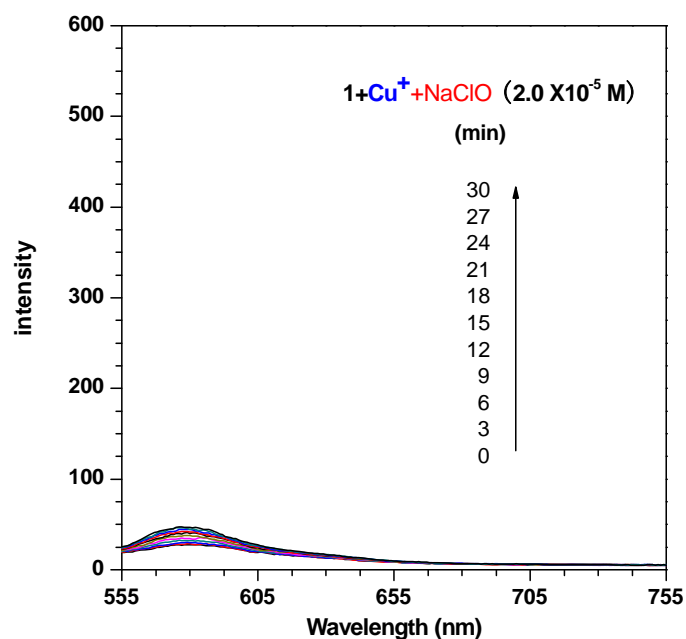

**Fig. S73** Fluorescence Emission spectra of **1** ( $1.0 \times 10^{-5}$  mol/L), CuI ( $4.0 \times 10^{-5}$  mol/L) and Sodium Ascorbate ( $3.0 \times 10^{-6}$  mol/L) in Tris-HCl (10mM, pH = 7.0) buffer containing 50% (v/v) water/CH<sub>3</sub>CN in the presence of NaClO ( $2.0 \times 10^{-5}$  mol/L) at different time. Excitation wavelength (nm):520.

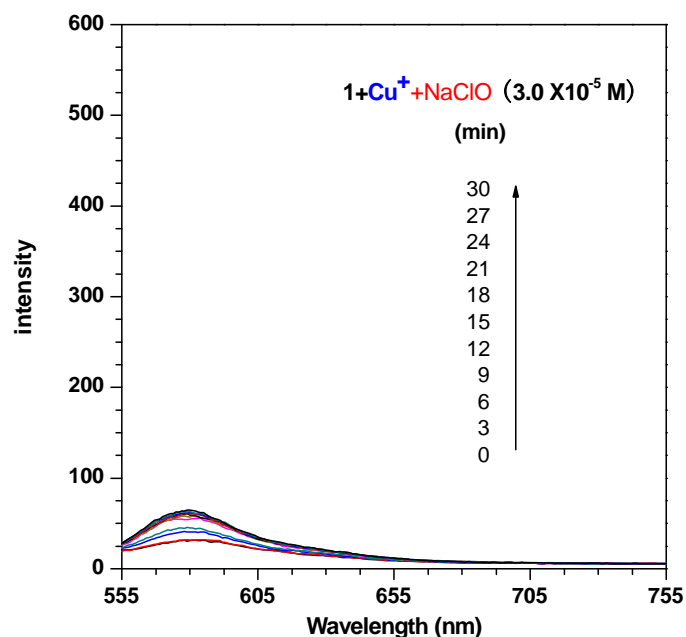

**Fig. S74** Fluorescence Emission spectra of **1** ( $1.0 \times 10^{-5}$  mol/L), CuI ( $4.0 \times 10^{-5}$  mol/L) and Sodium Ascorbate ( $3.0 \times 10^{-6}$  mol/L) in Tris-HCl (10mM, pH = 7.0) buffer containing 50% (v/v) water/CH<sub>3</sub>CN in the presence of NaClO ( $3.0 \times 10^{-5}$  mol/L) at different time. Excitation wavelength (nm):520.

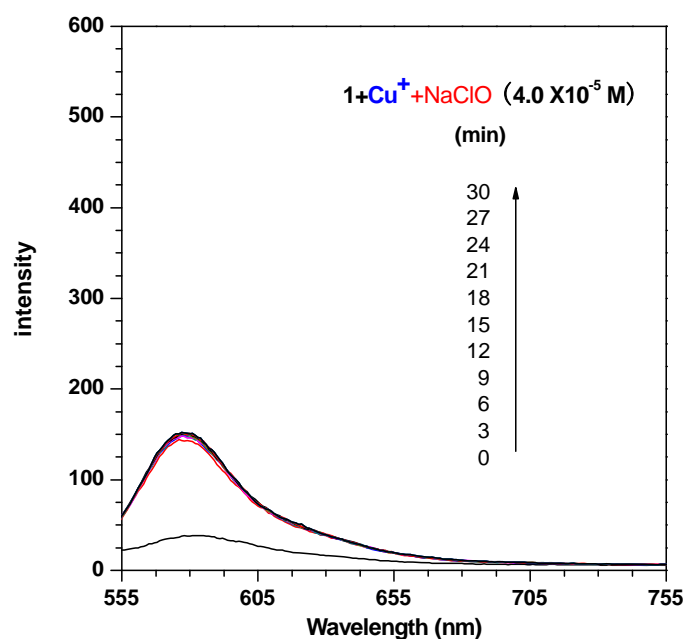

**Fig. S75** Fluorescence Emission spectra of **1** ( $1.0 \times 10^{-5}$  mol/L), CuI ( $4.0 \times 10^{-5}$  mol/L) and Sodium Ascorbate ( $3.0 \times 10^{-6}$  mol/L) in Tris-HCl (10mM, pH = 7.0) buffer containing 50% (v/v) water/CH<sub>3</sub>CN in the presence of NaClO ( $4.0 \times 10^{-5}$  mol/L) at different time. Excitation wavelength (nm):520.



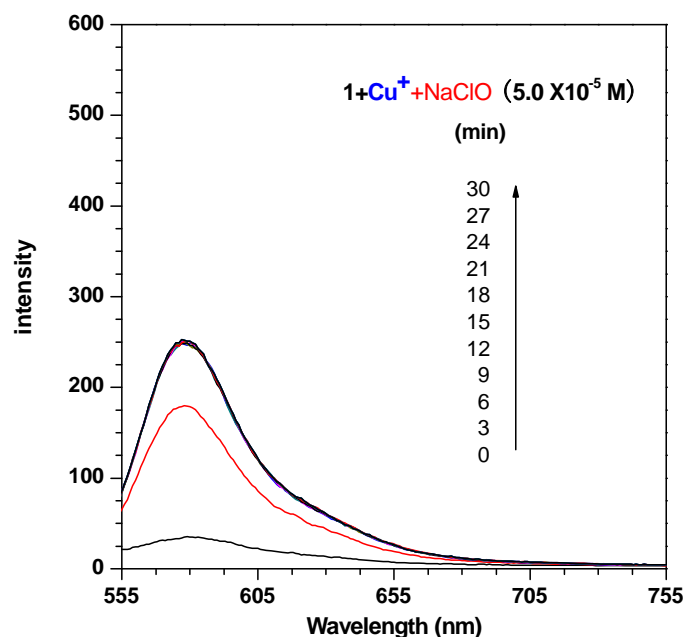

**Fig. S76** Fluorescence Emission spectra of **1** ( $1.0 \times 10^{-5}$  mol/L), CuI ( $4.0 \times 10^{-5}$  mol/L) and Sodium Ascorbate ( $3.0 \times 10^{-6}$  mol/L) in Tris-HCl (10mM, pH = 7.0) buffer containing 50% (v/v) water/CH<sub>3</sub>CN in the presence of NaClO ( $5.0 \times 10^{-5}$  mol/L) at different time. Excitation wavelength (nm):520.

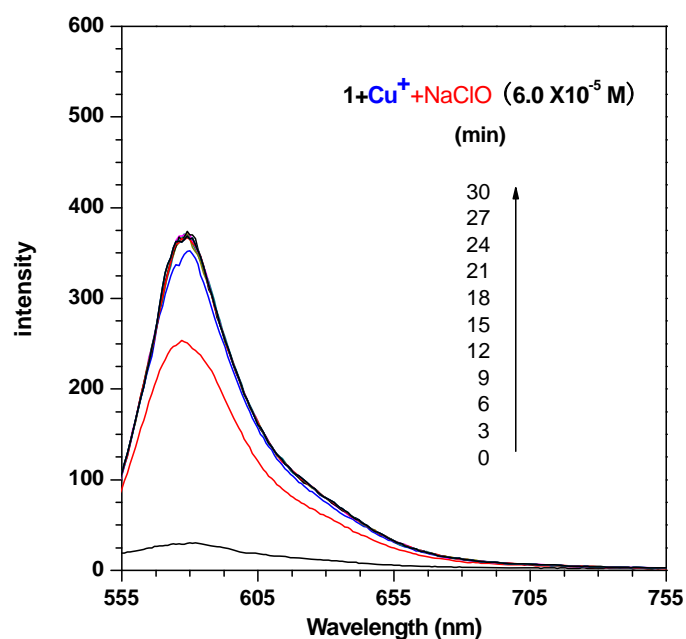

**Fig. S77** Fluorescence Emission spectra of **1** ( $1.0 \times 10^{-5}$  mol/L), CuI ( $4.0 \times 10^{-5}$  mol/L) and Sodium Ascorbate ( $3.0 \times 10^{-6}$  mol/L) in Tris-HCl (10mM, pH = 7.0) buffer containing 50% (v/v) water/CH<sub>3</sub>CN in the presence of NaClO ( $6.0 \times 10^{-5}$  mol/L) at different time. Excitation wavelength (nm):520.

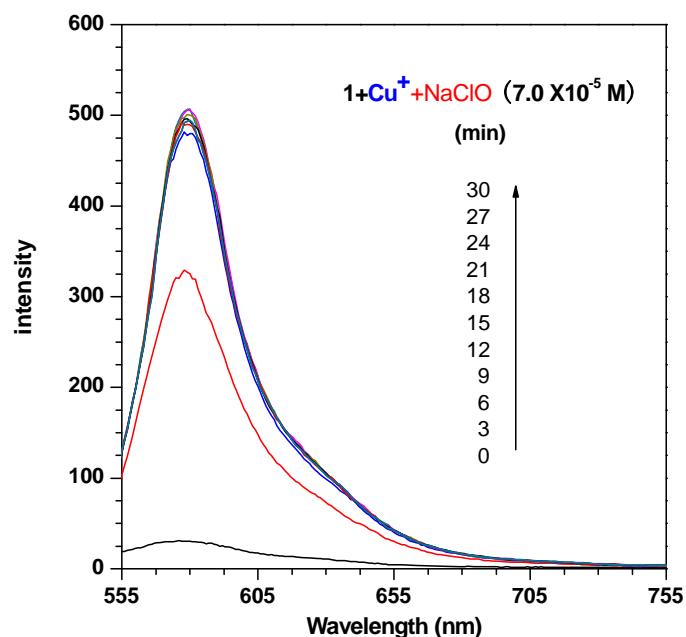

**Fig. S78** Fluorescence Emission spectra of **1** ( $1.0 \times 10^{-5}$  mol/L), CuI ( $4.0 \times 10^{-5}$  mol/L) and Sodium Ascorbate ( $3.0 \times 10^{-6}$  mol/L) in Tris-HCl (10mM, pH = 7.0) buffer containing 50% (v/v) water/CH<sub>3</sub>CN in the presence of NaClO ( $7.0 \times 10^{-5}$  mol/L) at different time. Excitation wavelength (nm):520.

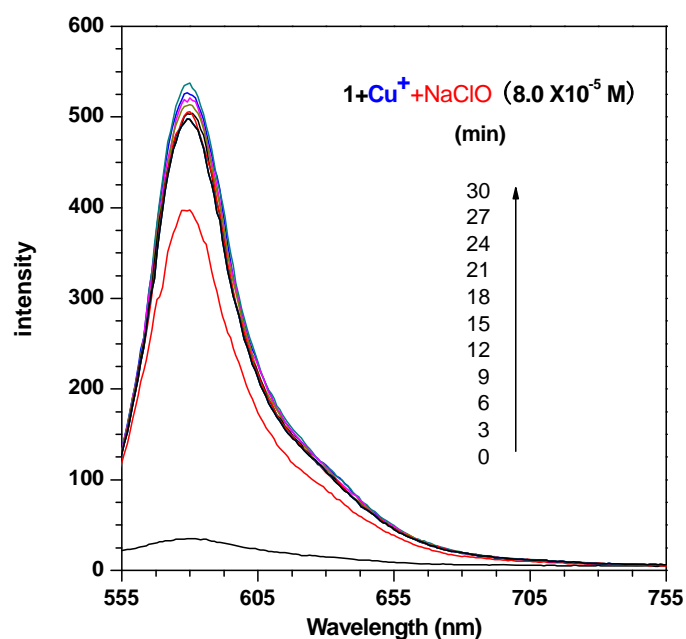

**Fig. S79** Fluorescence Emission spectra of **1** ( $1.0 \times 10^{-5}$  mol/L), CuI ( $4.0 \times 10^{-5}$  mol/L) and Sodium Ascorbate ( $3.0 \times 10^{-6}$  mol/L) in Tris-HCl (10mM, pH = 7.0) buffer containing 50% (v/v) water/CH<sub>3</sub>CN in the presence of NaClO ( $8.0 \times 10^{-5}$  mol/L) at different time. Excitation wavelength (nm):520.

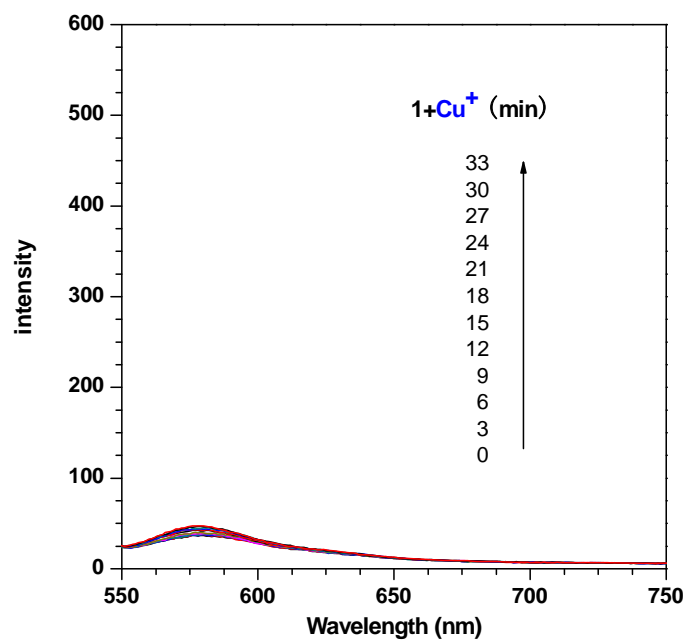

**Fig. S80** Fluorescence Emission spectra of **1** ( $1.0 \times 10^{-5}$  mol/L), CuI ( $3.0 \times 10^{-5}$  mol/L) and Sodium Ascorbate ( $1.0 \times 10^{-6}$  mol/L) in Tris-HCl (10mM, pH = 7.0) buffer containing 50% (v/v) water/CH<sub>3</sub>CN. Excitation wavelength (nm):520.

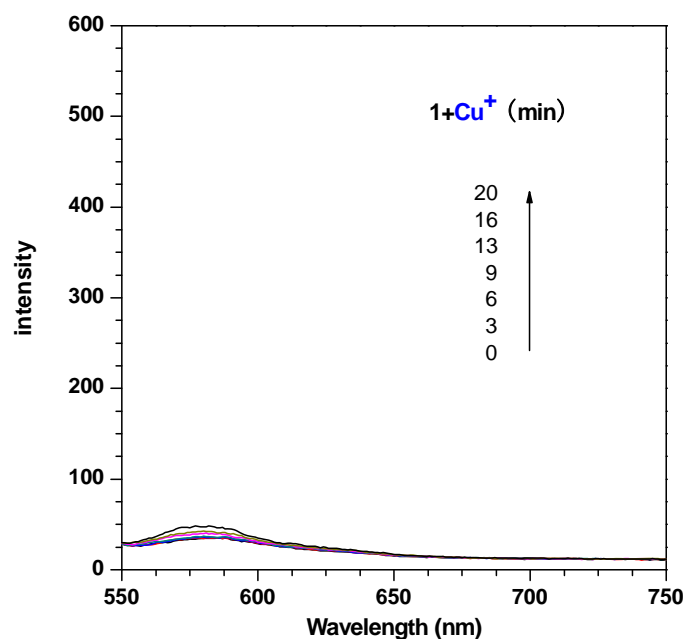

**Fig. S81** Fluorescence Emission spectra of **1** ( $1.0 \times 10^{-5}$  mol/L), CuI ( $6.0 \times 10^{-5}$  mol/L) and Sodium Ascorbate ( $1.0 \times 10^{-6}$  mol/L) in Tris-HCl (10mM, pH = 7.0) buffer containing 50% (v/v) water/CH<sub>3</sub>CN. Excitation wavelength (nm):520.

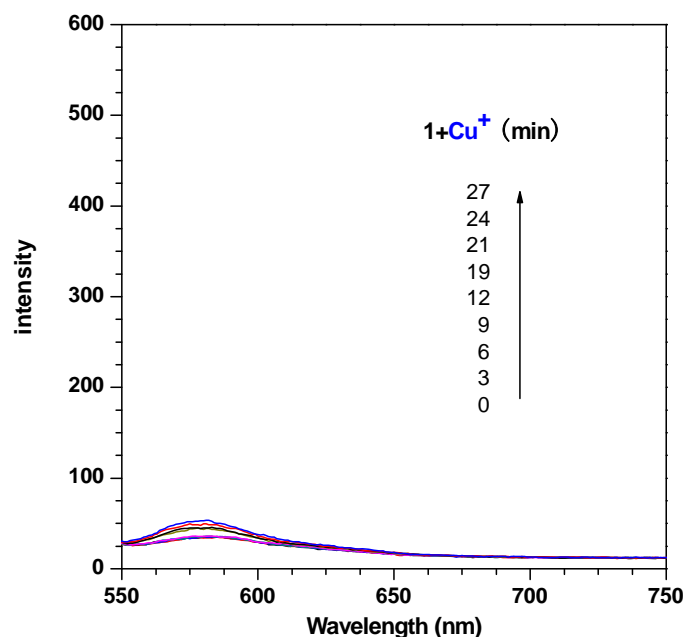

**Fig. S82** Fluorescence Emission spectra of **1** ( $1.0 \times 10^{-5}$  mol/L), CuI ( $6.0 \times 10^{-5}$  mol/L) and Sodium Ascorbate ( $3.0 \times 10^{-6}$  mol/L) in Tris-HCl (10mM, pH = 7.0) buffer containing 50% (v/v) water/CH<sub>3</sub>CN. Excitation wavelength (nm):520.

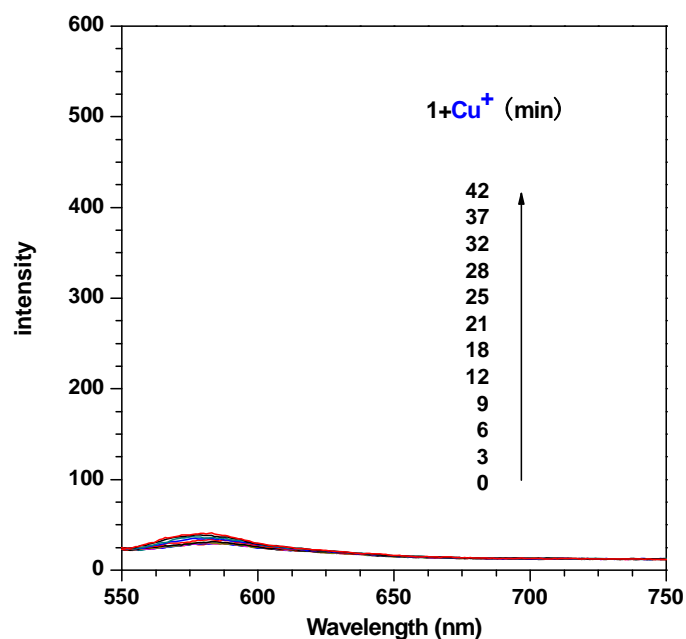

**Fig. S83** Fluorescence Emission spectra of **1** ( $1.0 \times 10^{-5}$  mol/L), CuI ( $4.0 \times 10^{-5}$  mol/L) and Sodium Ascorbate ( $3.0 \times 10^{-6}$  mol/L) in Tris-HCl (10mM, pH = 7.0) buffer containing 50% (v/v) water/CH<sub>3</sub>CN. Excitation wavelength (nm):520.

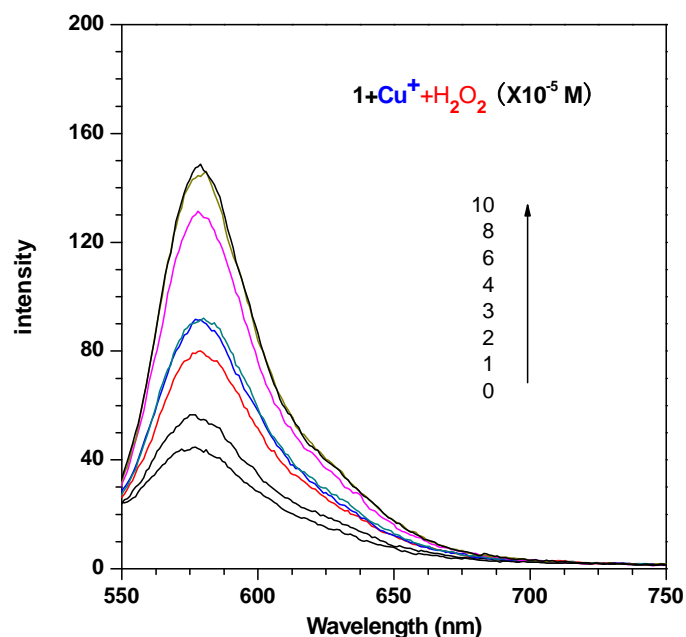

**Fig. S84** Fluorescence Emission spectra of **1** ( $1.0 \times 10^{-5}$  mol/L), CuI ( $4.0 \times 10^{-5}$  mol/L) and Sodium Ascorbate ( $3.0 \times 10^{-6}$  mol/L) in Tris-HCl (10mM, pH = 7.0) buffer containing 50% (v/v) water/CH<sub>3</sub>CN in the presence of different amounts of H<sub>2</sub>O<sub>2</sub> after 30min. Excitation wavelength (nm):520.

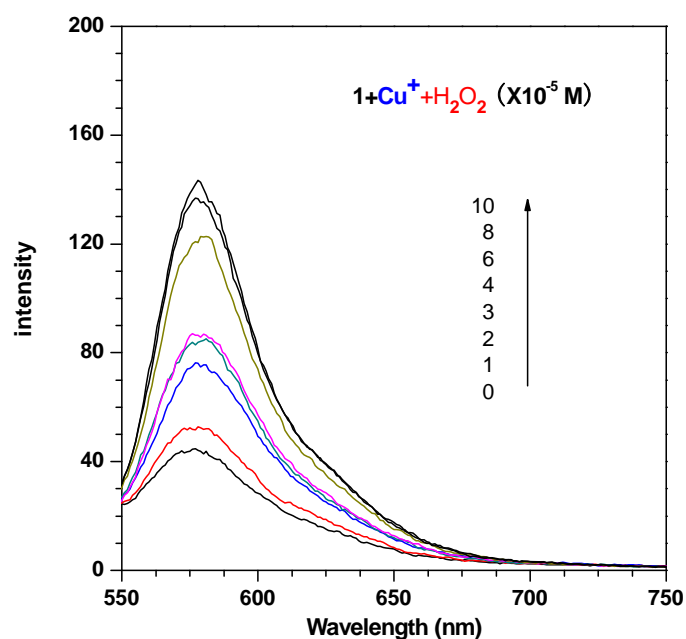

**Fig. S85** Fluorescence Emission spectra of **1** ( $1.0 \times 10^{-5}$  mol/L), CuI ( $4.0 \times 10^{-5}$  mol/L) and Sodium Ascorbate ( $3.0 \times 10^{-6}$  mol/L) in Tris-HCl (10mM, pH = 7.0) buffer containing 50% (v/v) water/CH<sub>3</sub>CN in the presence of different amounts of H<sub>2</sub>O<sub>2</sub> after 27min. Excitation wavelength (nm):520.

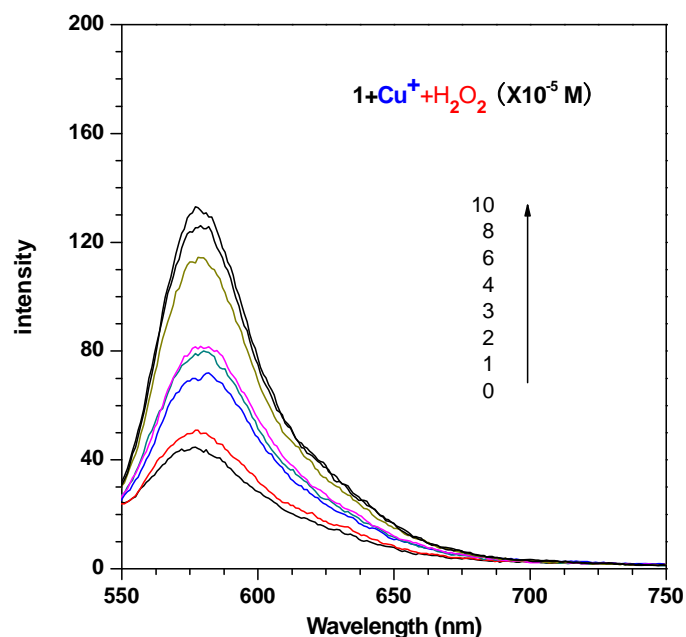

**Fig. S86** Fluorescence Emission spectra of **1** ( $1.0 \times 10^{-5}$  mol/L), CuI ( $4.0 \times 10^{-5}$  mol/L) and Sodium Ascorbate ( $3.0 \times 10^{-6}$  mol/L) in Tris-HCl (10mM, pH = 7.0) buffer containing 50% (v/v) water/CH<sub>3</sub>CN in the presence of different amounts of H<sub>2</sub>O<sub>2</sub> after 24min. Excitation wavelength (nm):520.

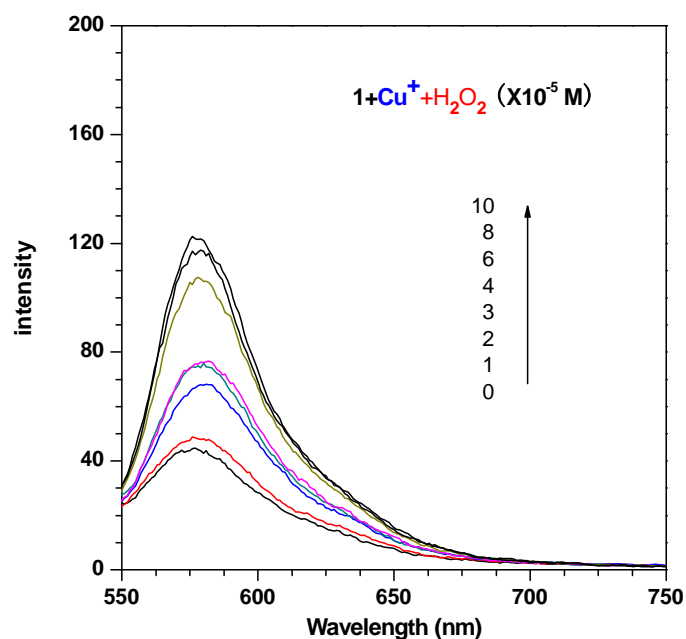

**Fig. S87** Fluorescence Emission spectra of **1** ( $1.0 \times 10^{-5}$  mol/L), CuI ( $4.0 \times 10^{-5}$  mol/L) and Sodium Ascorbate ( $3.0 \times 10^{-6}$  mol/L) in Tris-HCl (10mM, pH = 7.0) buffer containing 50% (v/v) water/CH<sub>3</sub>CN in the presence of different amounts of H<sub>2</sub>O<sub>2</sub> after 21min. Excitation wavelength (nm):520.

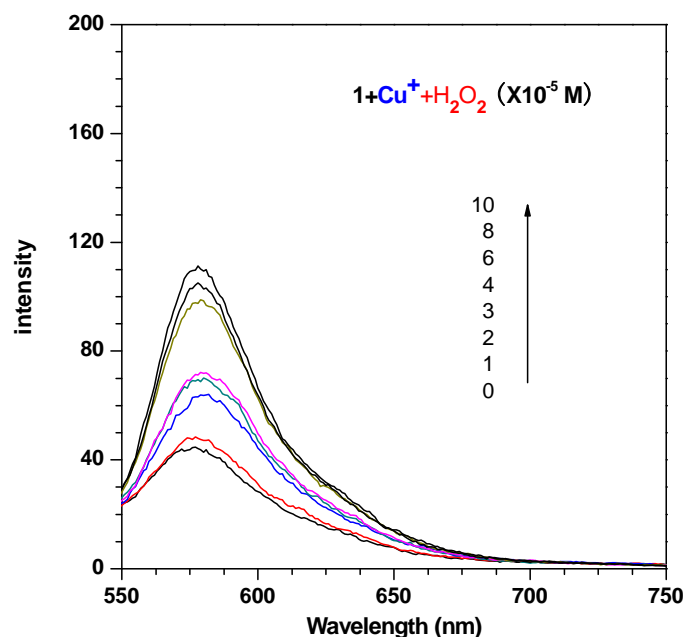

**Fig. S88** Fluorescence Emission spectra of **1** ( $1.0 \times 10^{-5}$  mol/L), CuI ( $4.0 \times 10^{-5}$  mol/L) and Sodium Ascorbate ( $3.0 \times 10^{-6}$  mol/L) in Tris-HCl (10mM, pH = 7.0) buffer containing 50% (v/v) water/CH<sub>3</sub>CN in the presence of different amounts of H<sub>2</sub>O<sub>2</sub> after 18min. Excitation wavelength (nm):520.

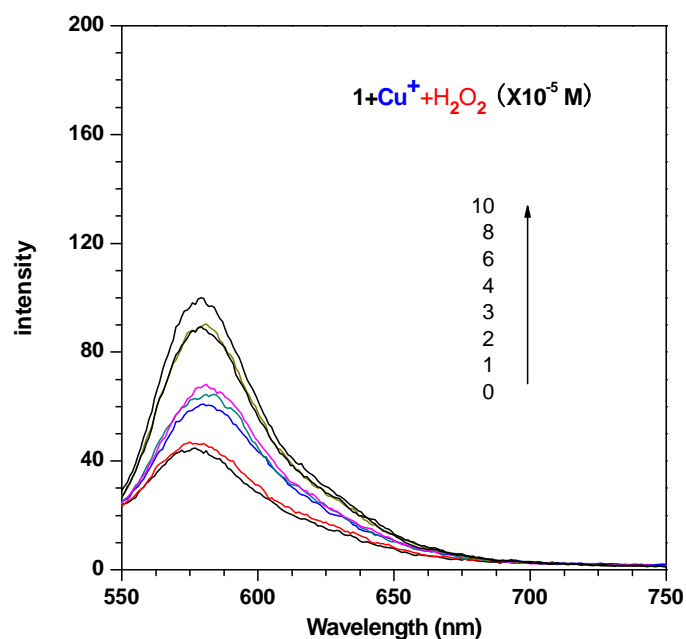

**Fig. S89** Fluorescence Emission spectra of **1** ( $1.0 \times 10^{-5}$  mol/L), CuI ( $4.0 \times 10^{-5}$  mol/L) and Sodium Ascorbate ( $3.0 \times 10^{-6}$  mol/L) in Tris-HCl (10mM, pH = 7.0) buffer containing 50% (v/v) water/CH<sub>3</sub>CN in the presence of different amounts of H<sub>2</sub>O<sub>2</sub> after 15min. Excitation wavelength (nm):520.

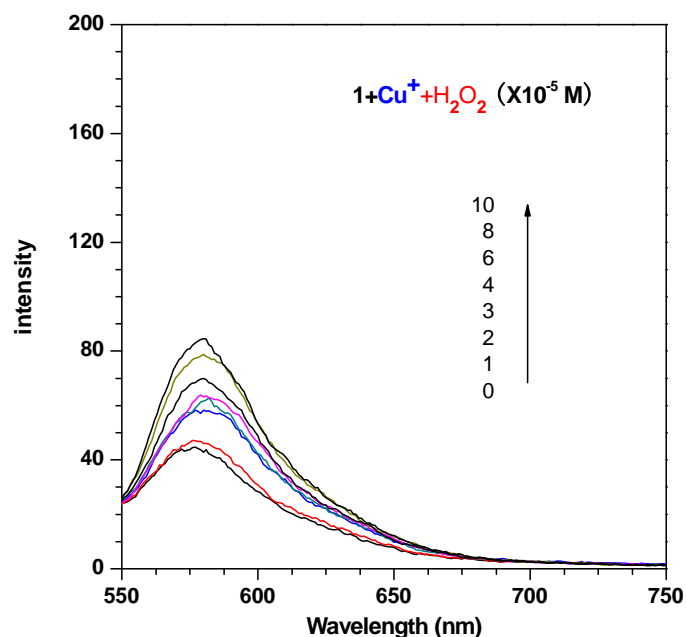

**Fig. S90** Fluorescence Emission spectra of **1** ( $1.0 \times 10^{-5}$  mol/L), CuI ( $4.0 \times 10^{-5}$  mol/L) and Sodium Ascorbate ( $3.0 \times 10^{-6}$  mol/L) in Tris-HCl (10mM, pH = 7.0) buffer containing 50% (v/v) water/CH<sub>3</sub>CN in the presence of different amounts of H<sub>2</sub>O<sub>2</sub> after 12min. Excitation wavelength (nm):520.

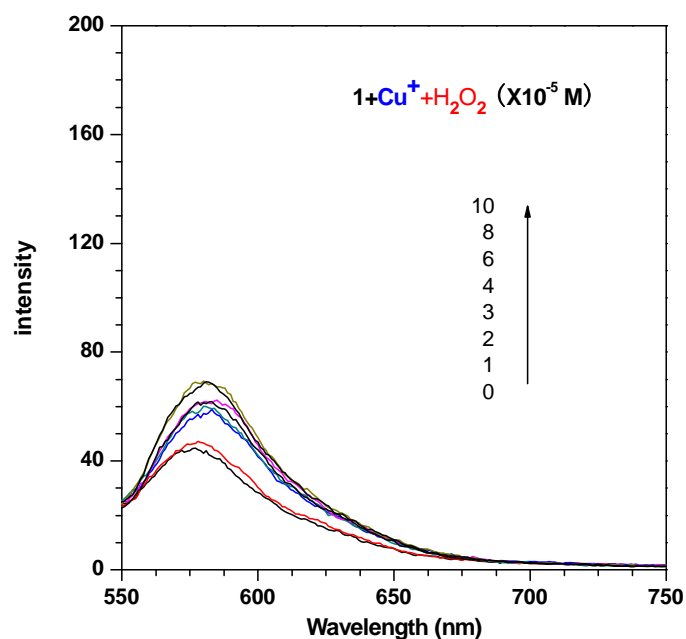

**Fig. S91** Fluorescence Emission spectra of **1** ( $1.0 \times 10^{-5}$  mol/L), CuI ( $4.0 \times 10^{-5}$  mol/L) and Sodium Ascorbate ( $3.0 \times 10^{-6}$  mol/L) in Tris-HCl (10mM, pH = 7.0) buffer containing 50% (v/v) water/CH<sub>3</sub>CN in the presence of different amounts of H<sub>2</sub>O<sub>2</sub> after 9min. Excitation wavelength (nm):520.



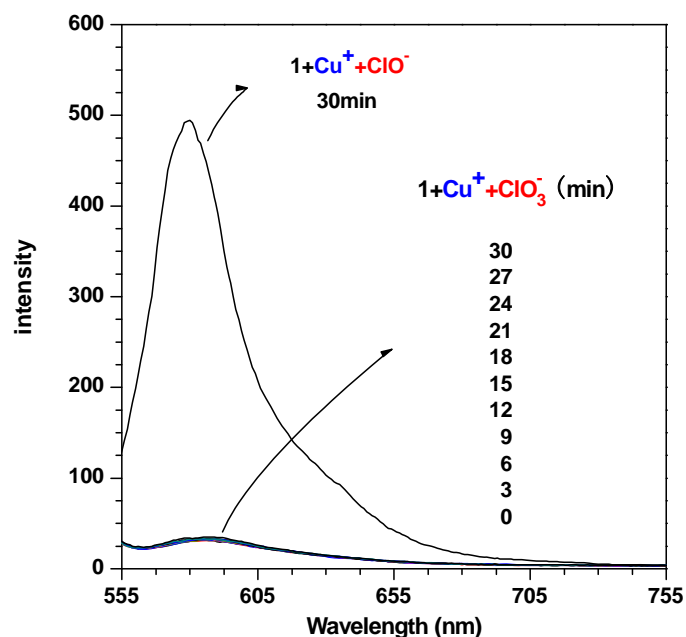

**Fig. S92** Fluorescence Emission spectra of **1** ( $1.0 \times 10^{-5}$  mol/L), CuI ( $4.0 \times 10^{-5}$  mol/L) and Sodium Ascorbate ( $3.0 \times 10^{-6}$  mol/L) in Tris-HCl (10mM, pH = 7.0) buffer containing 50% (v/v) water/ $\text{CH}_3\text{CN}$  in the presence of  $\text{ClO}_3^-$  ( $1.3 \times 10^{-4}$  mol/L). The concentration of  $\text{ClO}^-$  was  $7.0 \times 10^{-5}$  mol/L. Excitation wavelength (nm):520.

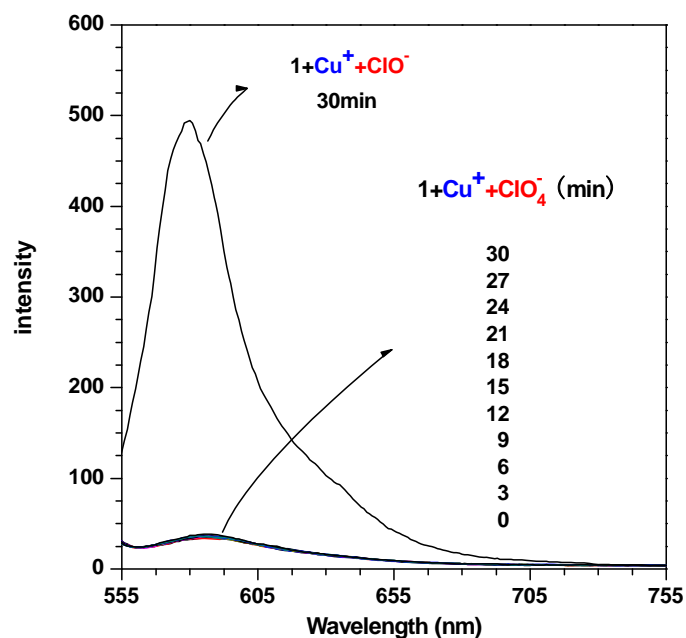

**Fig. S93** Fluorescence Emission spectra of **1** ( $1.0 \times 10^{-5}$  mol/L), CuI ( $4.0 \times 10^{-5}$  mol/L) and Sodium Ascorbate ( $3.0 \times 10^{-6}$  mol/L) in Tris-HCl (10mM, pH = 7.0) buffer containing 50% (v/v) water/ $\text{CH}_3\text{CN}$  in the presence of  $\text{ClO}_4^-$  ( $1.3 \times 10^{-4}$  mol/L). The concentration of  $\text{ClO}^-$  was  $7.0 \times 10^{-5}$  mol/L. Excitation wavelength (nm):520.

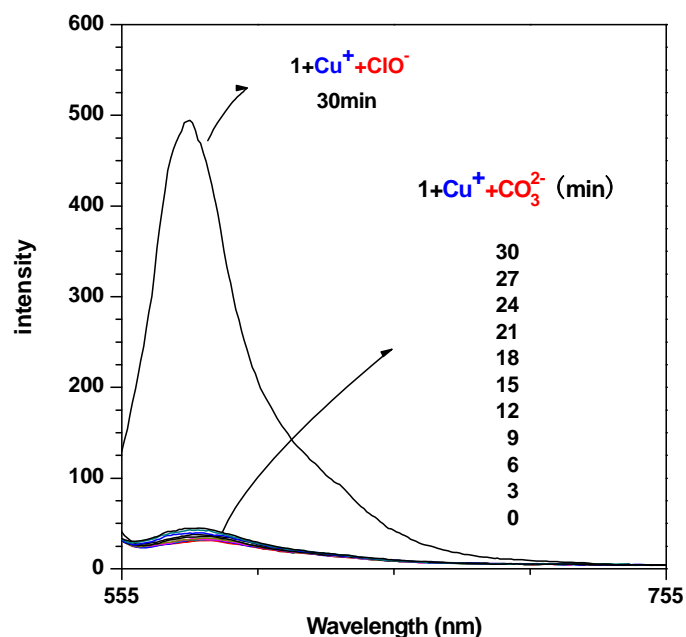

**Fig. S94** Fluorescence Emission spectra of **1** ( $1.0 \times 10^{-5}$  mol/L), CuI ( $4.0 \times 10^{-5}$  mol/L) and Sodium Ascorbate ( $3.0 \times 10^{-6}$  mol/L) in Tris-HCl (10mM, pH = 7.0) buffer containing 50% (v/v) water/CH<sub>3</sub>CN in the presence of CO<sub>3</sub><sup>2-</sup> ( $1.3 \times 10^{-4}$  mol/L). The concentration of ClO<sup>-</sup> was  $7.0 \times 10^{-5}$  mol/L. Excitation wavelength (nm):520.

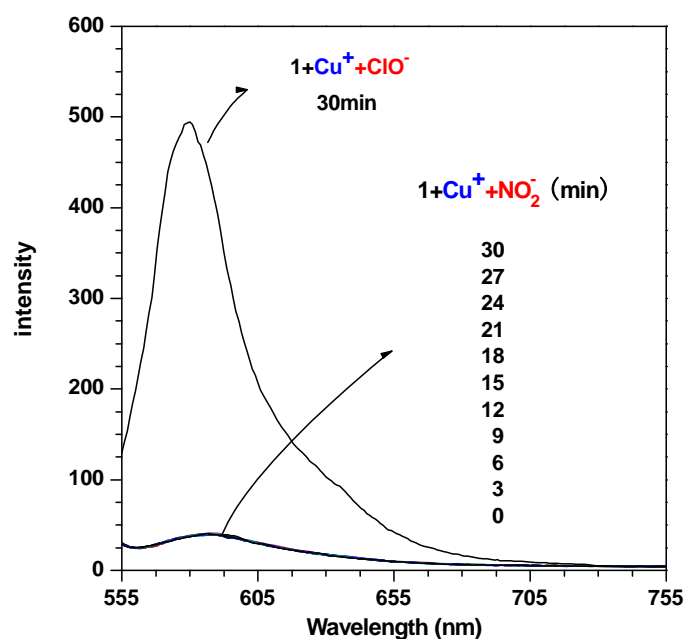

**Fig. S95** Fluorescence Emission spectra of **1** ( $1.0 \times 10^{-5}$  mol/L), CuI ( $4.0 \times 10^{-5}$  mol/L) and Sodium Ascorbate ( $3.0 \times 10^{-6}$  mol/L) in Tris-HCl (10mM, pH = 7.0) buffer containing 50% (v/v) water/CH<sub>3</sub>CN in the presence of NO<sub>2</sub><sup>-</sup> ( $1.3 \times 10^{-4}$  mol/L). The concentration of ClO<sup>-</sup> was  $7.0 \times 10^{-5}$  mol/L. Excitation wavelength (nm):520.

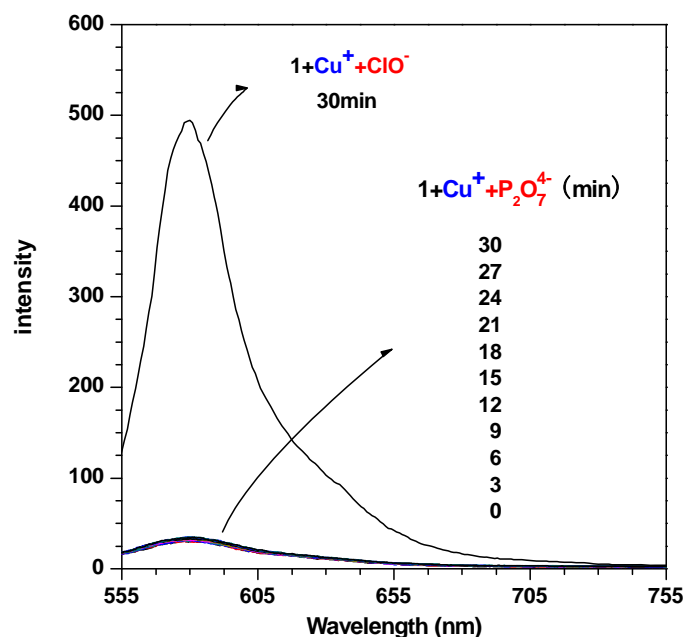

**Fig. S96** Fluorescence Emission spectra of **1** ( $1.0 \times 10^{-5}$  mol/L), CuI ( $4.0 \times 10^{-5}$  mol/L) and Sodium Ascorbate ( $3.0 \times 10^{-6}$  mol/L) in Tris-HCl (10mM, pH = 7.0) buffer containing 50% (v/v) water/CH<sub>3</sub>CN in the presence of P<sub>2</sub>O<sub>7</sub><sup>4-</sup> ( $1.3 \times 10^{-4}$  mol/L). The concentration of ClO<sup>-</sup> was  $7.0 \times 10^{-5}$  mol/L. Excitation wavelength (nm):520.

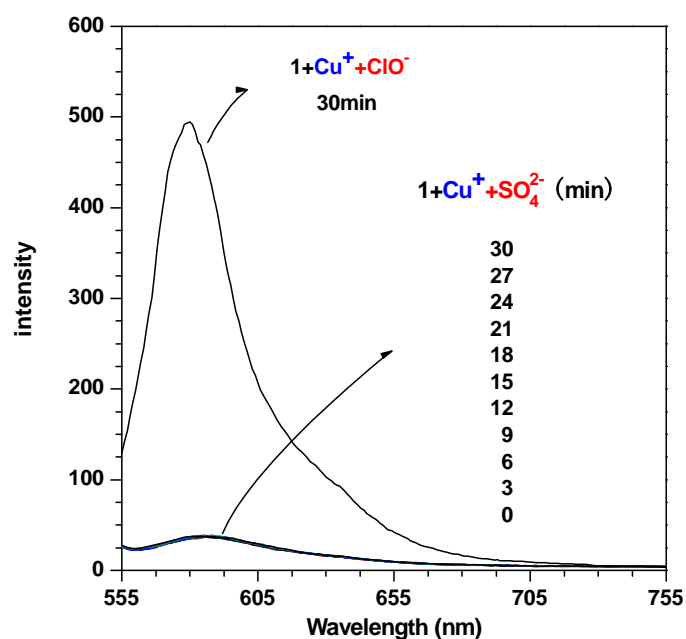

**Fig. S97** Fluorescence Emission spectra of **1** ( $1.0 \times 10^{-5}$  mol/L), CuI ( $4.0 \times 10^{-5}$  mol/L) and Sodium Ascorbate ( $3.0 \times 10^{-6}$  mol/L) in Tris-HCl (10mM, pH = 7.0) buffer containing 50% (v/v) water/CH<sub>3</sub>CN in the presence of SO<sub>4</sub><sup>2-</sup> ( $1.3 \times 10^{-4}$  mol/L). The concentration of ClO<sup>-</sup> was  $7.0 \times 10^{-5}$  mol/L. Excitation wavelength (nm):520.

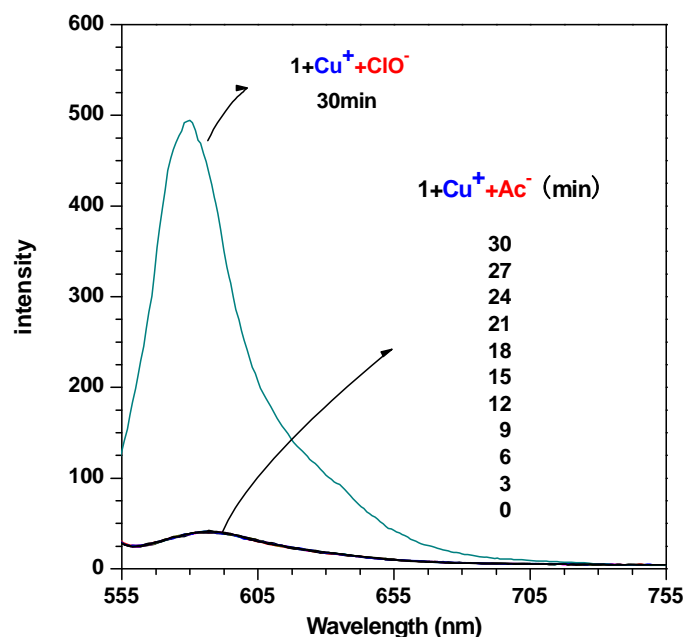

**Fig. S98** Fluorescence Emission spectra of **1** ( $1.0 \times 10^{-5}$  mol/L), CuI ( $4.0 \times 10^{-5}$  mol/L) and Sodium Ascorbate ( $3.0 \times 10^{-6}$  mol/L) in Tris-HCl (10mM, pH = 7.0) buffer containing 50% (v/v) water/CH<sub>3</sub>CN in the presence of Ac<sup>-</sup> ( $1.3 \times 10^{-4}$  mol/L). The concentration of ClO<sup>-</sup> was  $7.0 \times 10^{-5}$  mol/L. Excitation wavelength (nm):520.

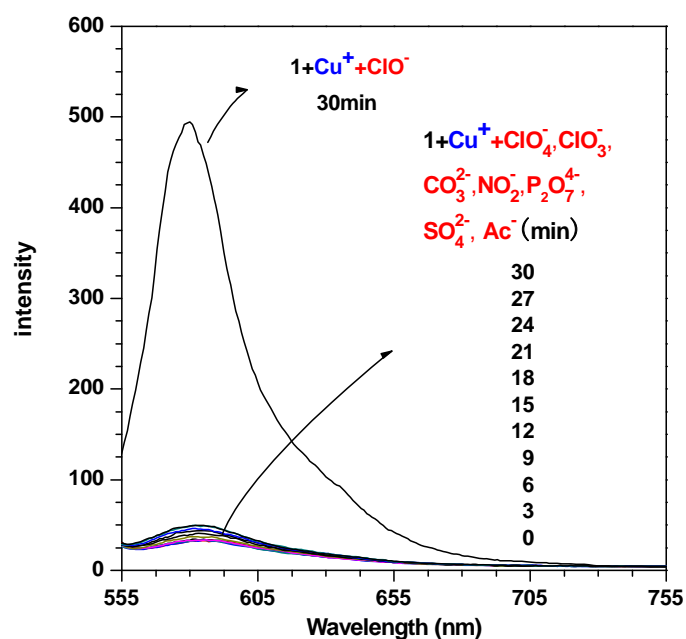

**Fig. S99** Fluorescence Emission spectra of **1** ( $1.0 \times 10^{-5}$  mol/L), CuI ( $4.0 \times 10^{-5}$  mol/L) and Sodium Ascorbate ( $3.0 \times 10^{-6}$  mol/L) in Tris-HCl (10mM, pH = 7.0) buffer containing 50% (v/v) water/CH<sub>3</sub>CN in the presence of the mix anions ( $1.3 \times 10^{-4}$  mol/L). The concentration of ClO<sup>-</sup> was  $7.0 \times 10^{-5}$  mol/L. Excitation wavelength (nm):520.

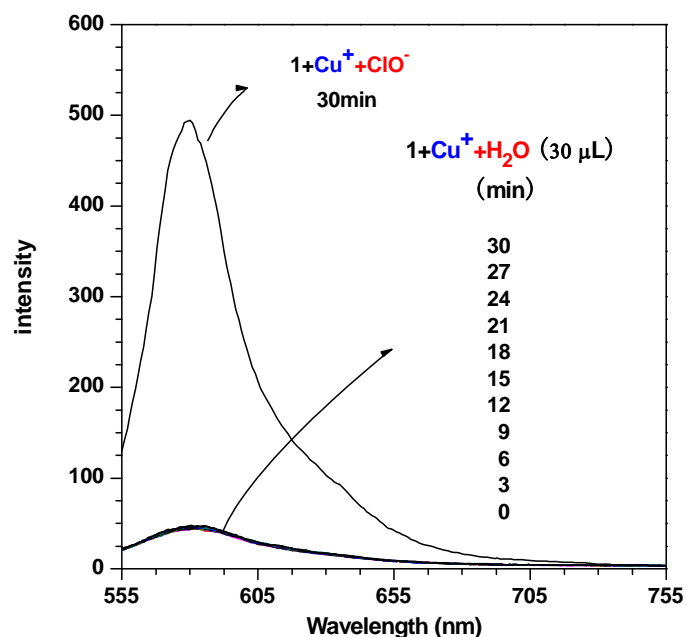

**Fig. S100** Fluorescence Emission spectra of **1** ( $1.0 \times 10^{-5}$  mol/L), CuI ( $4.0 \times 10^{-5}$  mol/L) and Sodium Ascorbate ( $3.0 \times 10^{-6}$  mol/L) in Tris-HCl (10mM, pH = 7.0) buffer containing 50% (v/v) water/CH<sub>3</sub>CN in the presence of 30µL water. The concentration of ClO<sup>-</sup> was  $7.0 \times 10^{-5}$  mol/L. Excitation wavelength (nm):520.

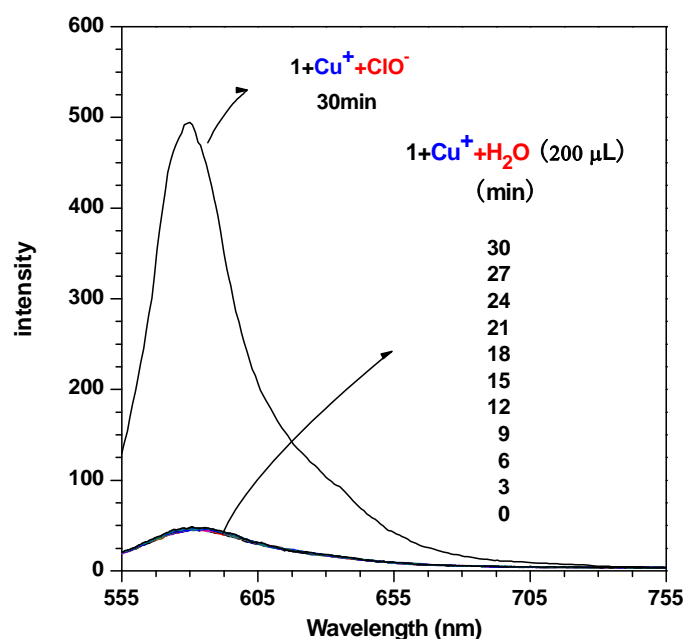

**Fig. S101** Fluorescence Emission spectra of **1** ( $1.0 \times 10^{-5}$  mol/L), CuI ( $4.0 \times 10^{-5}$  mol/L) and Sodium Ascorbate ( $3.0 \times 10^{-6}$  mol/L) in Tris-HCl (10mM, pH = 7.0) buffer containing 50% (v/v) water/CH<sub>3</sub>CN in the presence of 200µL water. The concentration of ClO<sup>-</sup> was  $7.0 \times 10^{-5}$  mol/L. Excitation wavelength (nm):520.

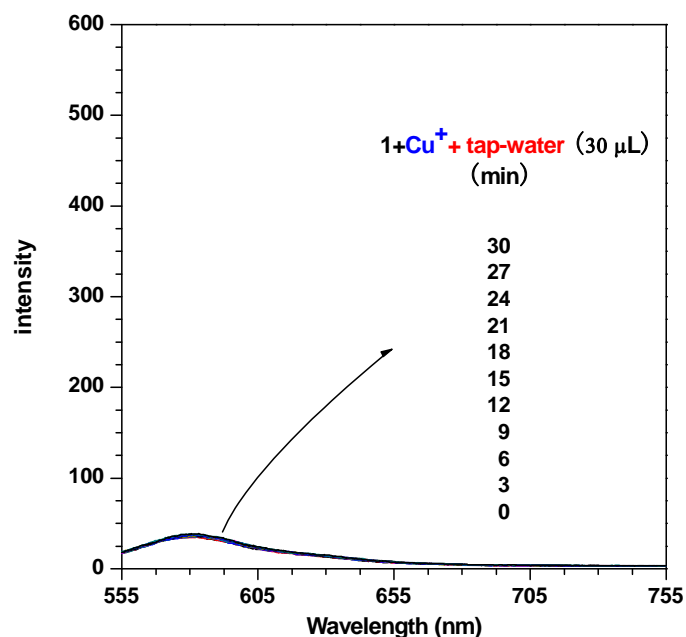

**Fig. S102** Fluorescence Emission spectra of **1** ( $1.0 \times 10^{-5}$  mol/L), CuI ( $4.0 \times 10^{-5}$  mol/L) and Sodium Ascorbate ( $3.0 \times 10^{-6}$  mol/L) in Tris-HCl (10mM, pH = 7.0) buffer containing 50% (v/v) water/CH<sub>3</sub>CN in the presence of 30µL tap-water. Excitation wavelength (nm):520.

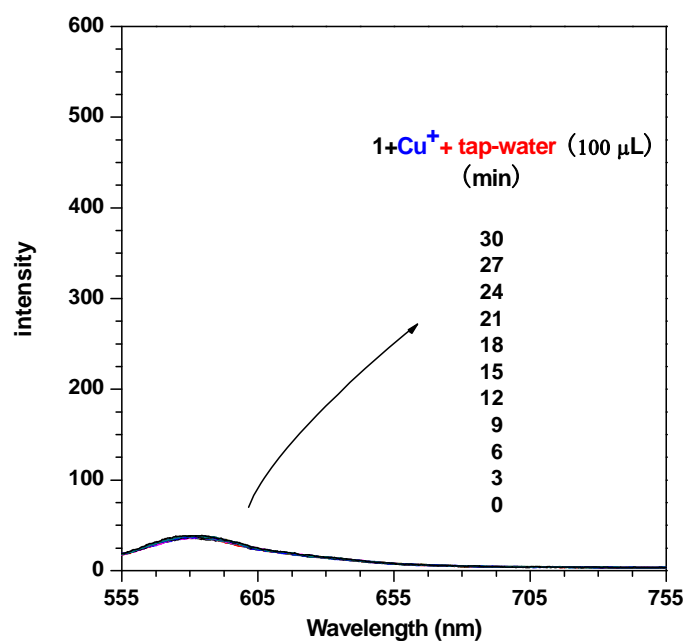

**Fig. S103** Fluorescence Emission spectra of **1** ( $1.0 \times 10^{-5}$  mol/L), CuI ( $4.0 \times 10^{-5}$  mol/L) and Sodium Ascorbate ( $3.0 \times 10^{-6}$  mol/L) in Tris-HCl (10mM, pH = 7.0) buffer containing 50% (v/v) water/CH<sub>3</sub>CN in the presence of 100µL tap-water. Excitation wavelength (nm):520.

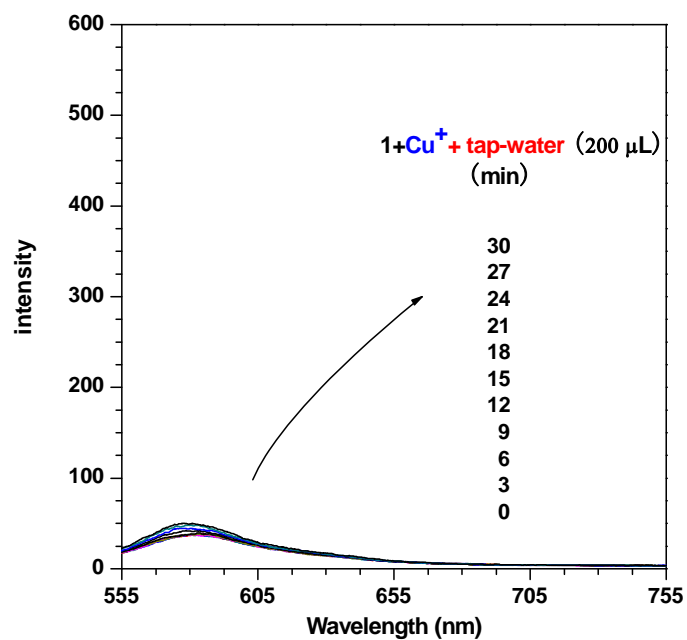

**Fig. S104** Fluorescence Emission spectra of **1** ( $1.0 \times 10^{-5}$  mol/L), CuI ( $4.0 \times 10^{-5}$  mol/L) and Sodium Ascorbate ( $3.0 \times 10^{-6}$  mol/L) in Tris-HCl (10mM, pH = 7.0) buffer containing 50% (v/v) water/CH<sub>3</sub>CN in the presence of 200μL tap-water. Excitation wavelength (nm):520.
